# Supplementary material for: Long noncoding RNA Malat1 protects against osteoporosis and bone metastasis
Source: PubMed Central journal article supplement (PMC10944492; doi:10.1038/s41467-024-46602-3), 2024-03-16

# Supplementary Information

## Long noncoding RNA Malat1 protects against osteoporosis and bone metastasis

Yang Zhao *et al.*

\*Correspondence: Li Ma ([lma4@mdanderson.org](mailto:lma4@mdanderson.org))

**This PDF file includes:**

Supplementary Figures 1-11

**Other Supplementary Materials for this manuscript include the following:**

Supplementary Data 1-5

Source Data

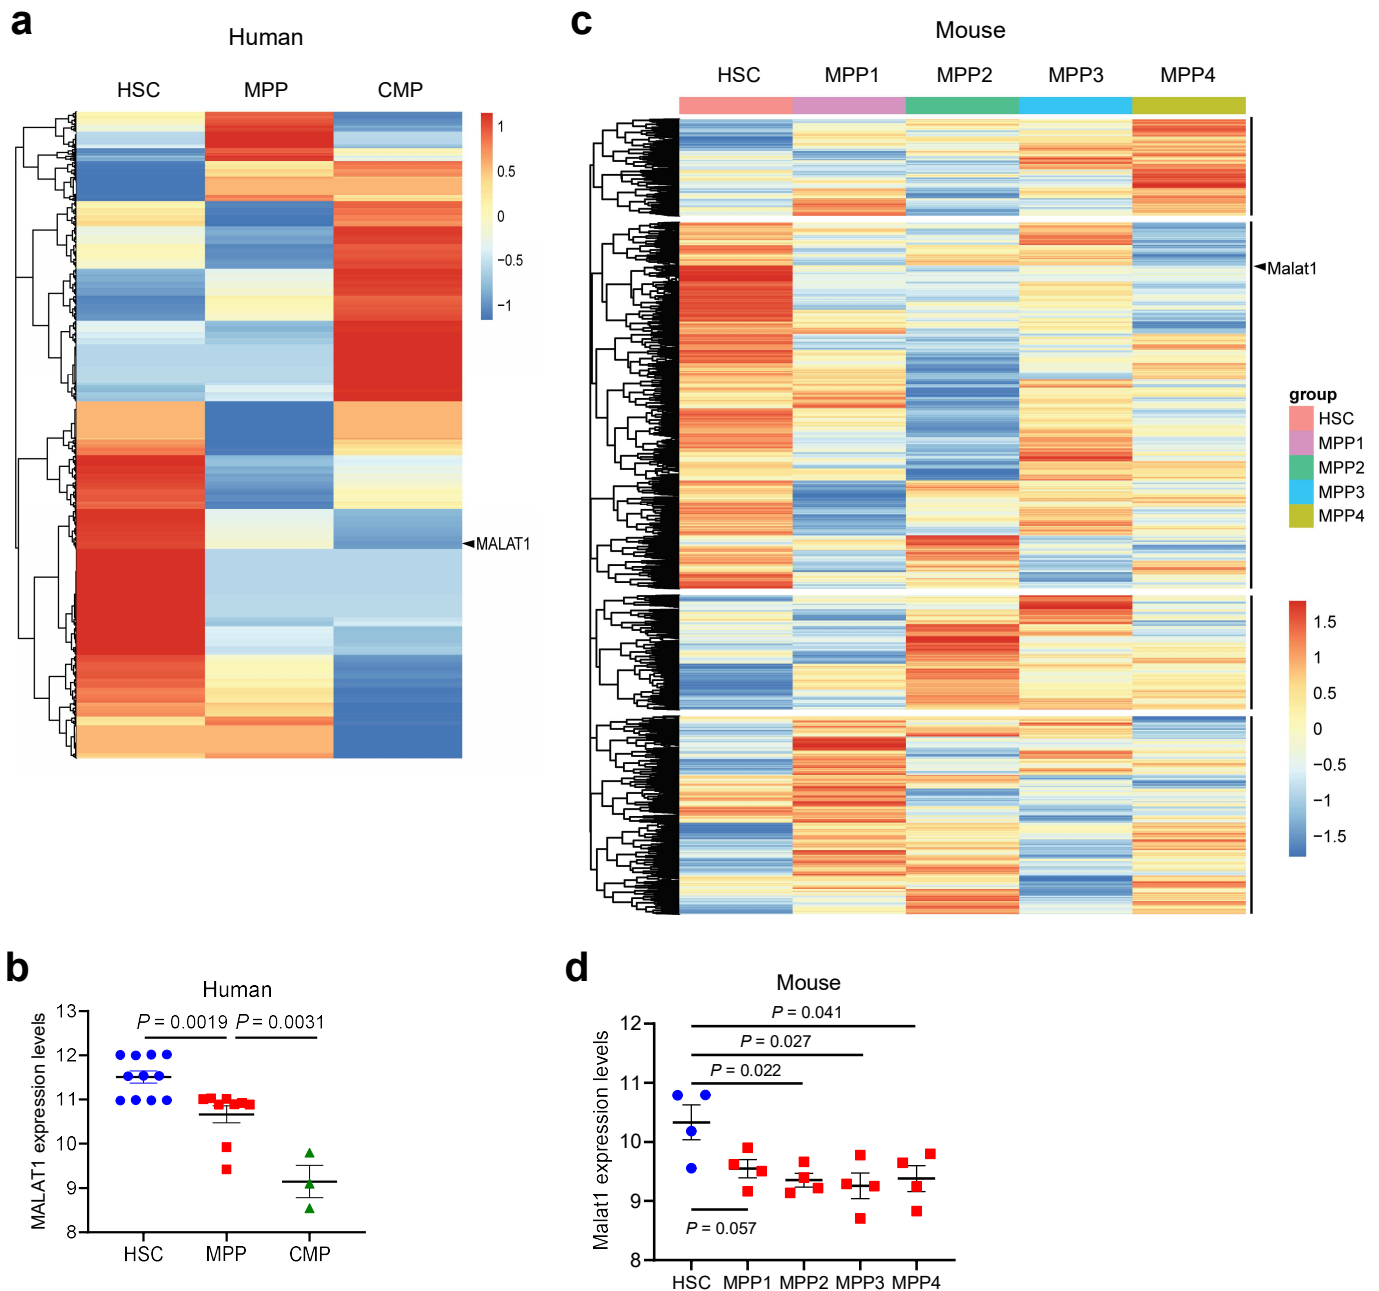

**Supplementary Figure 1. Malat1 is downregulated in hematopoietic progenitor cells compared with hematopoietic stem cells in humans and mice.**

**a.** Heatmap of differentially expressed genes among human hematopoietic stem cells (HSC), multipotent progenitors (MPP), and common myeloid progenitors (CMP). Data source: Expression Atlas dataset E-MTAB-3819.

**b.** Expression levels of MALAT1, calculated as  $\log_2(\text{FPKM} + 1)$  values, were quantitated from the RNA-seq results in **a**.  $n = 11$  (from 4 healthy individuals with 1-4 replicates), 9 (from 4 healthy individuals from 1-4 replicates), and 3 (from 3 healthy individuals) samples for HSC, MPP, and CMP groups, respectively.

**c.** Heatmap of differentially expressed genes among mouse hematopoietic stem cells (HSC) and four groups of multipotent progenitors (MPP). Data source: Expression Atlas dataset E-MTAB-7391.

**d.** Expression levels of Malat1, calculated as  $\log_2(\text{FPKM} + 1)$  values, were quantitated from the RNA-seq results in **c**.  $n = 4$  samples per group, each containing cells pooled from 3 mice.

Statistical significance in **b** and **d** was determined by a two-tailed unpaired *t*-test. Error bars are s.e.m. Source data are provided as a Source Data file.

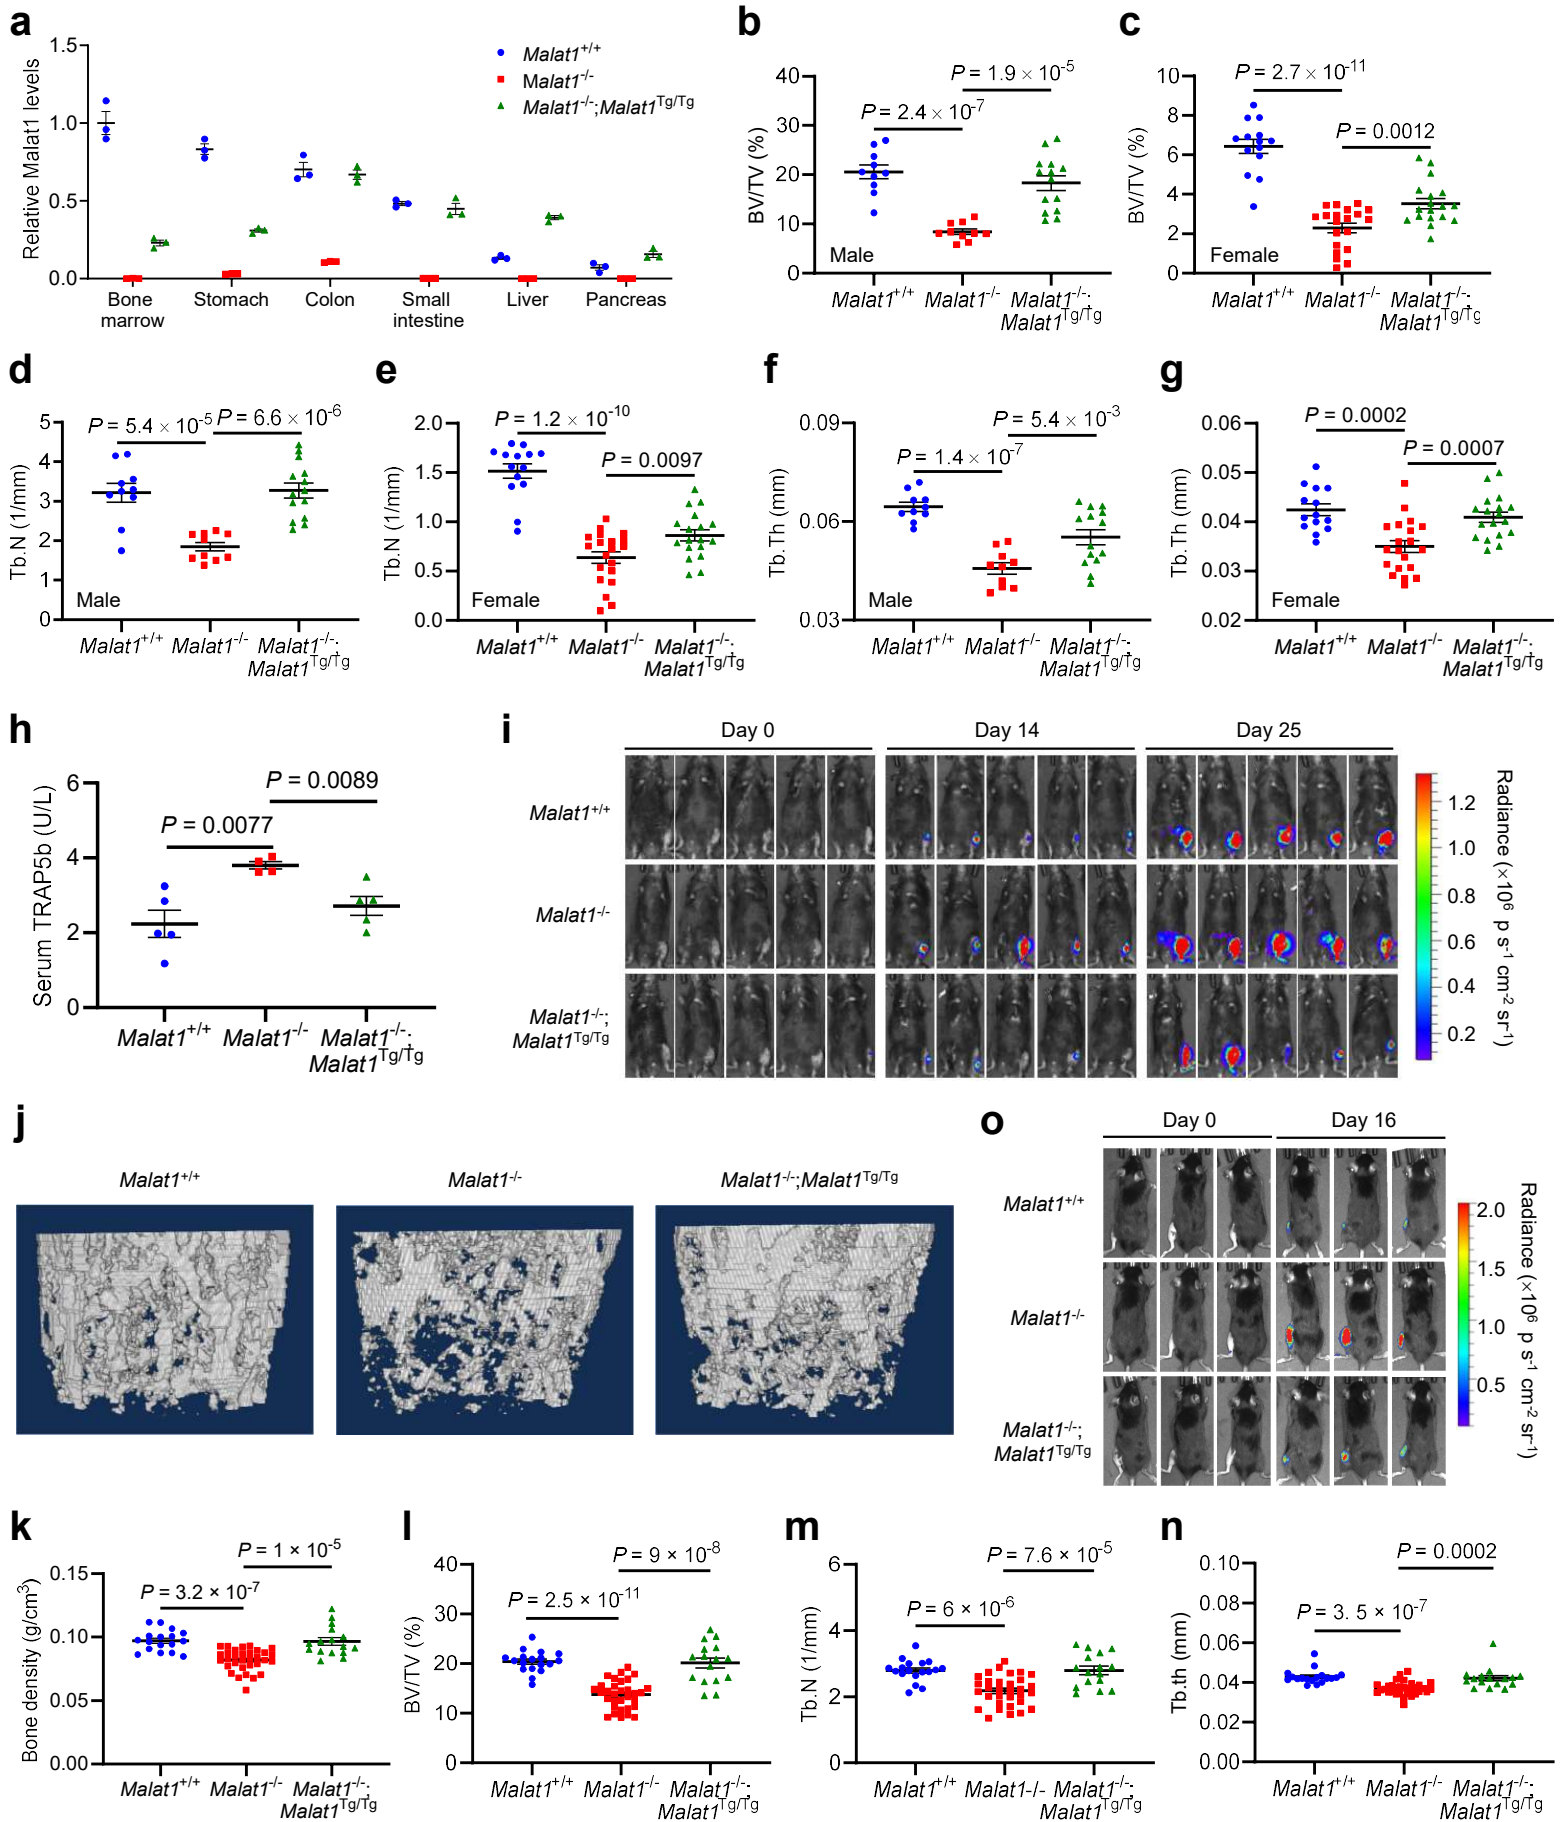

## Supplementary Figure 2. Malat1 is a suppressor of osteoporosis and bone metastasis.

- a.** qPCR of Malat1 in various organs of *Malat1*<sup>+/+</sup>, *Malat1*<sup>-/-</sup>, and *Malat1*<sup>-/-</sup>;*Malat1*<sup>Tg/Tg</sup> mice. *n* = 3 biological replicates per group.
- b-g.**  $\mu$ CT-based measurements of the trabecular bone volume per tissue volume (BV/TV, **b** and **c**), trabecular number (Tb.N, **d** and **e**), and trabecular thickness (Tb.th, **f** and **g**) in the femurs from 6-month-old male (*n* = 5, 5, and 7 mice per group) and female (*n* = 7, 10, and 9 mice per group) *Malat1*<sup>+/+</sup>, *Malat1*<sup>-/-</sup>, and *Malat1*<sup>-/-</sup>;*Malat1*<sup>Tg/Tg</sup> mice, with left and right femurs for each mouse measured.
- h.** ELISA of serum TRAP5b levels in 6-month-old male *Malat1*<sup>+/+</sup>, *Malat1*<sup>-/-</sup>, and *Malat1*<sup>-/-</sup>;*Malat1*<sup>Tg/Tg</sup> mice. *n* = 5, 4, and 5 mice per group.
- i.** 6-month-old *Malat1*<sup>+/+</sup>, *Malat1*<sup>-/-</sup>, and *Malat1*<sup>-/-</sup>;*Malat1*<sup>Tg/Tg</sup> mice received intratibial injection of 5,000 B16F1 melanoma cells. Bioluminescent imaging of live animals was performed at the indicated times.
- j.** Representative  $\mu$ CT images of 3D bone structures of the femurs from 3-month-old female *Malat1*<sup>+/+</sup>, *Malat1*<sup>-/-</sup>, and *Malat1*<sup>-/-</sup>;*Malat1*<sup>Tg/Tg</sup> mice.
- k-n.**  $\mu$ CT-based measurements of the bone mineral density (BMD, **k**), trabecular bone volume per tissue volume (BV/TV, **l**), trabecular number (Tb.N, **m**), and trabecular thickness (Tb.th, **n**) in the femurs from 3-month-old female *Malat1*<sup>+/+</sup>, *Malat1*<sup>-/-</sup>, and *Malat1*<sup>-/-</sup>;*Malat1*<sup>Tg/Tg</sup> mice, with left and right femurs for each mouse measured. *n* = 9, 16, and 8 mice per group.
- o.** 3-month-old female *Malat1*<sup>+/+</sup>, *Malat1*<sup>-/-</sup>, and *Malat1*<sup>-/-</sup>;*Malat1*<sup>Tg/Tg</sup> mice received intratibial injection of  $2 \times 10^5$  EO771 mammary tumor cells. Bioluminescent imaging of live animals was performed at day 0 and day 16.

Statistical significance in **b-h** and **k-n** was determined by a two-tailed unpaired *t*-test. Error bars are s.e.m. Source data are provided as a Source Data file.

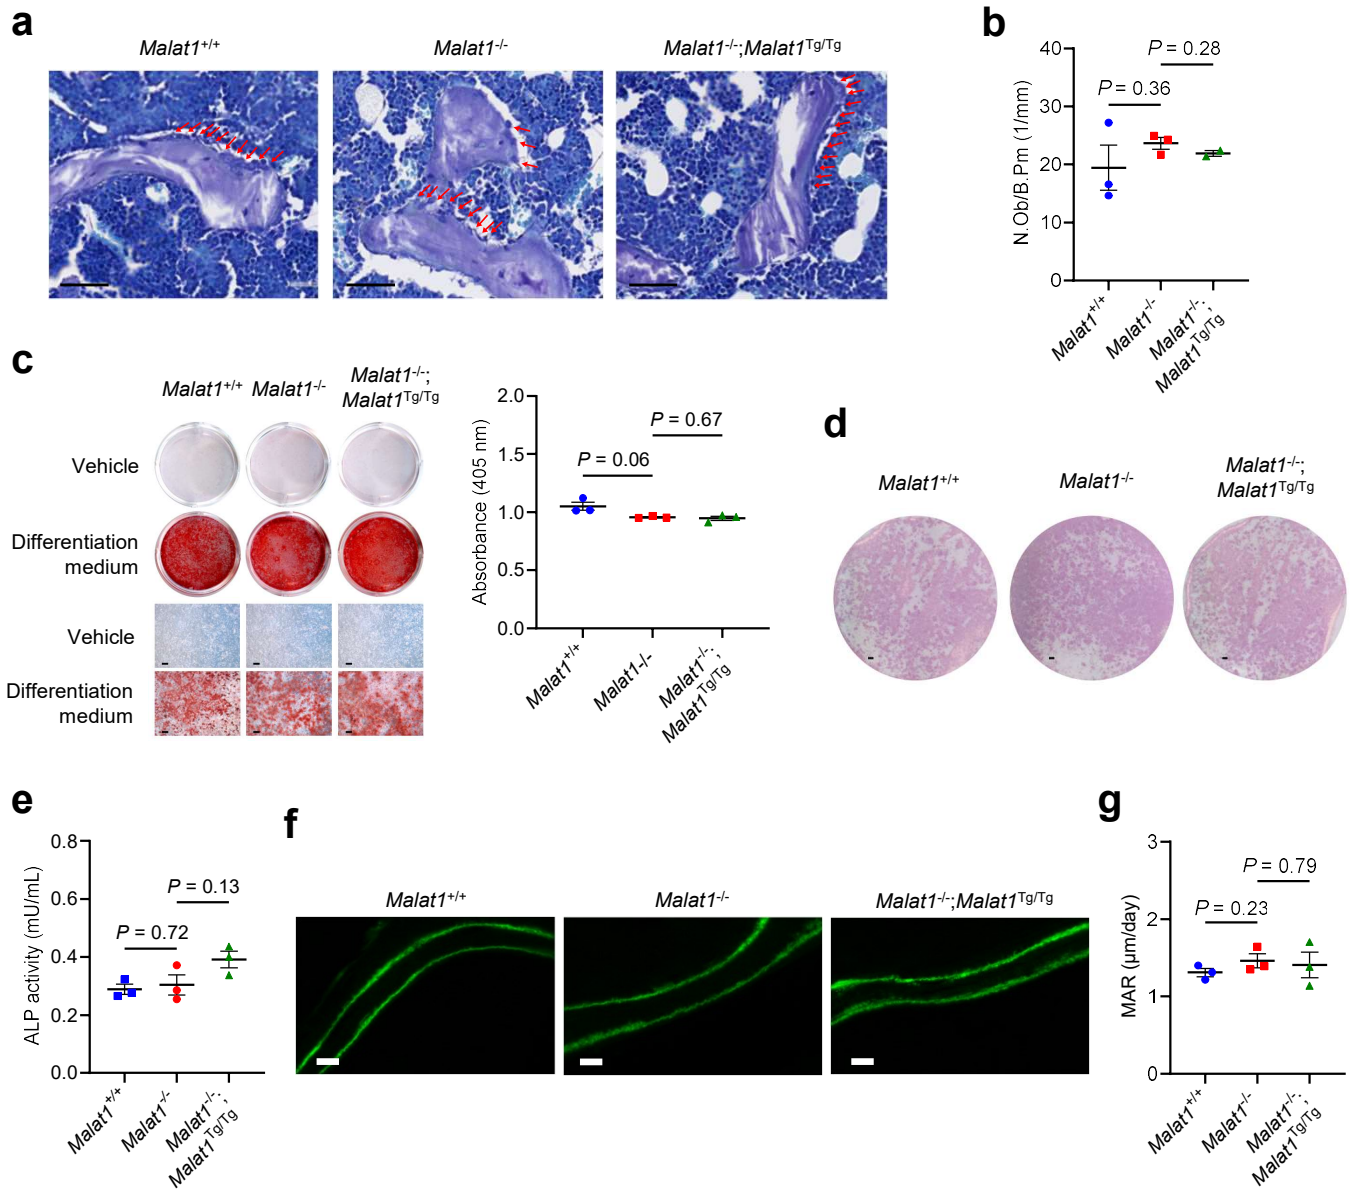

### Supplementary Figure 3. *Malat1* is not involved in osteoblastic bone formation.

**a.** Toluidine blue staining of sections of the femurs from 2-month-old male *Malat1*<sup>+/+</sup>, *Malat1*<sup>-/-</sup>, and *Malat1*<sup>-/-</sup>;*Malat1*<sup>Tg/Tg</sup> mice. Scale bars, 50 μm. Red arrows indicate osteoblasts.

**b.** Quantification of the osteoblast numbers per bone perimeter (N.Ob/B.Pm) in the mice described in **a**. *n* = 3 mice per group.

**c.** Mesenchymal stem cells (MSCs) were isolated from *Malat1*<sup>+/+</sup>, *Malat1*<sup>-/-</sup>, and *Malat1*<sup>-/-</sup>;*Malat1*<sup>Tg/Tg</sup> mice, cultured in osteogenic differentiation medium for 14 days, and subjected to alizarin red S (ARS) staining (left panel). Scale bars, 100 μm. ARS stains were dissolved and quantitated as absorbance at 405 nm (right panel). *n* = 3 mice per group.

**d.** Mesenchymal stem cells (MSCs) were isolated from *Malat1*<sup>+/+</sup>, *Malat1*<sup>-/-</sup>, and *Malat1*<sup>-/-</sup>;*Malat1*<sup>Tg/Tg</sup> mice, cultured in differentiation medium for 14 days, and subjected to alkaline phosphatase (ALP) staining. Scale bars, 1 mm.

**e.** Activity of secreted ALP was measured in the culture medium collected after the MSC differentiation described in **d**. *n* = 3 mice per group.

**f.** Representative images of bone formation rates of 2-month-old male *Malat1*<sup>+/+</sup>, *Malat1*<sup>-/-</sup>, and *Malat1*<sup>-/-</sup>;*Malat1*<sup>Tg/Tg</sup> mice, as determined by sequential labeling with calcein. Scale bars, 10 μm.

**g.** Bone histomorphometric analysis of mineral apposition rate (MAR) in the femurs of 2-month-old male *Malat1*<sup>+/+</sup>, *Malat1*<sup>-/-</sup>, and *Malat1*<sup>-/-</sup>;*Malat1*<sup>Tg/Tg</sup> mice. *n* = 3 mice per group.

Statistical significance in **b**, **c**, **e**, and **g** was determined by a two-tailed unpaired *t*-test. Error bars are s.e.m. Source data are provided as a Source Data file.

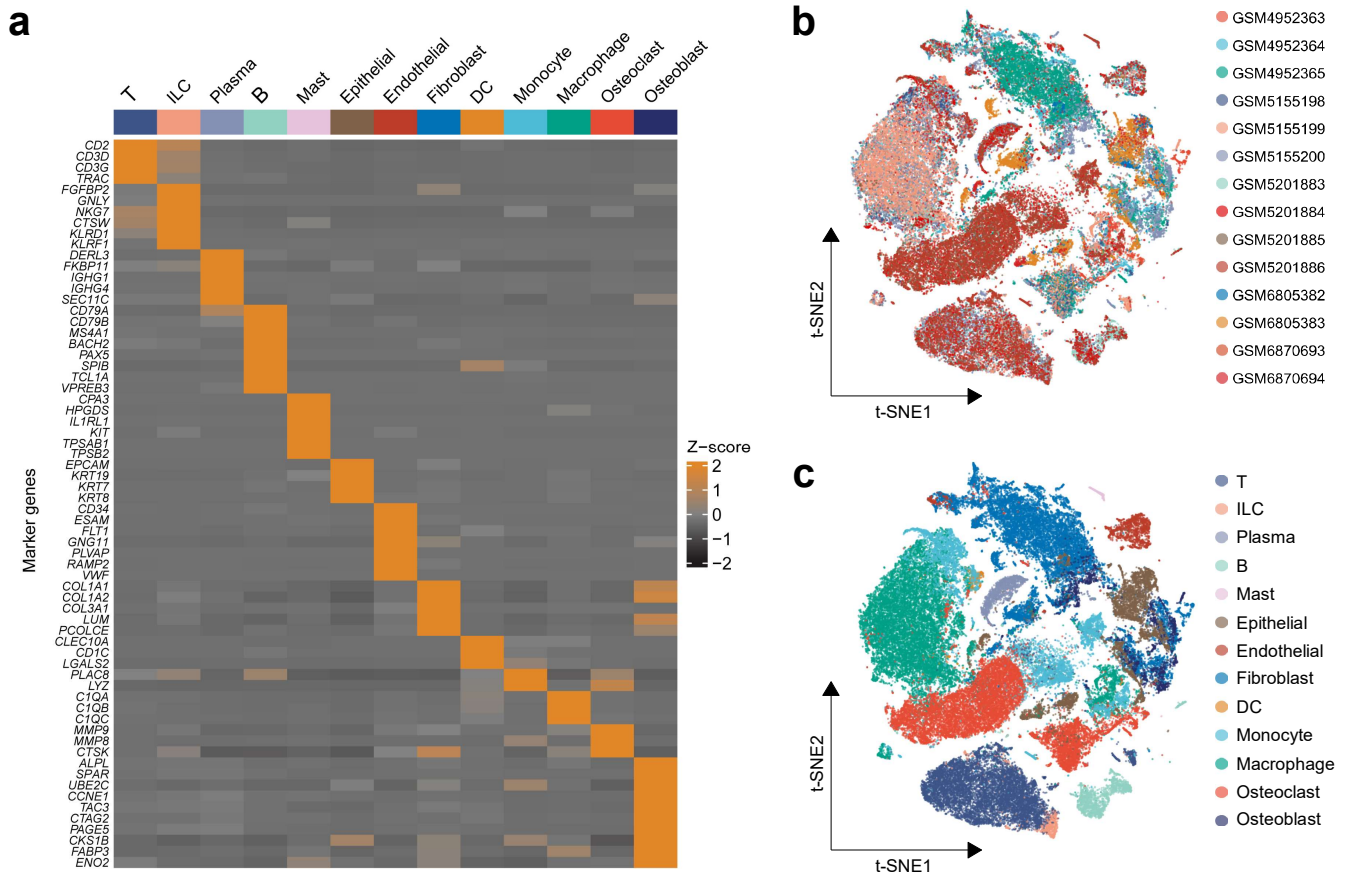

**Supplementary Figure 4. The landscape of single-cell annotation.**

**a.** Heatmap of marker genes used in the cell annotation.

**b, c.** The t-SNE dimensionality reduction plot (**b**) and the cell annotation t-SNE plot (**c**) showing the cellular landscape after batch effect removal by using the harmony method in the meta queue (one non-osteoporotic patient: GSM5201885; three osteoporosis patients: GSM5201883, GSM5201884, GSM5201886; six osteosarcoma patients: GSM4952363, GSM4952364, GSM4952365, GSM5155198, GSM5155199, GSM5155200; four samples from two patients with breast cancer bone metastasis: GSM6870693, GSM6870694, GSM6805382, GSM6805383).

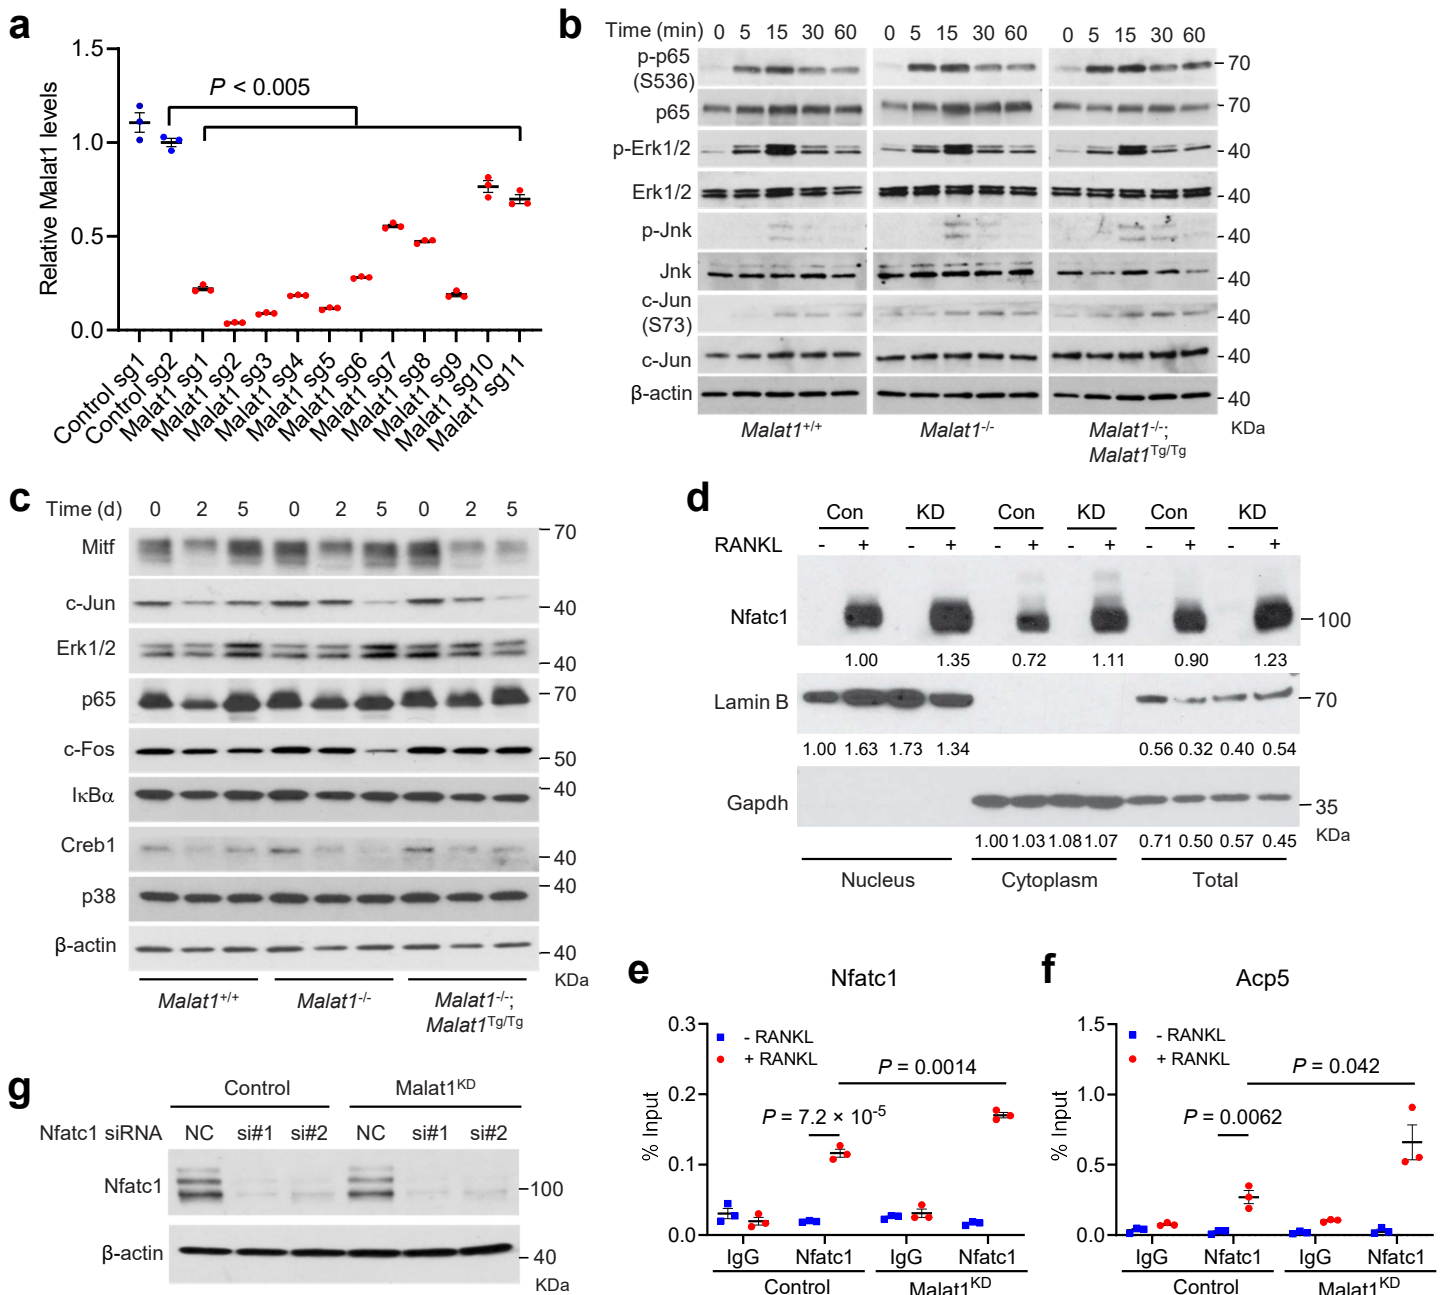

### Supplementary Figure 5. Effects of CRISPRi-mediated knockdown of Malat1 on pro-osteoclastogenic signaling and Nfatc1.

**a.** qPCR of Malat1 in B16F1 cells with CRISPRi-mediated knockdown of Malat1.  $n = 3$  biological replicates per group.

**b.** *Malat1*<sup>+/+</sup>, *Malat1*<sup>-/-</sup>, and *Malat1*<sup>-/-</sup>;*Malat1*<sup>Tg/Tg</sup> BMMs were cultured with M-CSF (50 ng/mL) before stimulation with RANKL (100 ng/mL) for 0, 5, 15, 30, and 60 min. The cell lysates were subjected to immunoblotting with antibodies against phospho-p65, p65, phospho-Erk1/2, Erk1/2, phospho-Jnk, Jnk, phospho-c-Jun, c-Jun, and  $\beta$ -actin.

**c.** *Malat1*<sup>+/+</sup>, *Malat1*<sup>-/-</sup>, and *Malat1*<sup>-/-</sup>;*Malat1*<sup>Tg/Tg</sup> BMMs were treated with M-CSF (50 ng/mL) and RANKL (100 ng/mL) for 2 days and 5 days. The cell lysates were subjected to immunoblotting with antibodies against Mitf, c-Jun, Erk1/2, p65, c-Fos, I $\kappa$ B $\alpha$ , Creb1, p38, and  $\beta$ -actin.

**d.** Control and Malat1-knockdown RAW264.7 cells were cultured with RANKL (50 ng/mL) and fractionated. The cytoplasmic and nuclear fractions, along with total cell lysates, were subjected to immunoblotting with antibodies against Nfatc1, Gapdh (a cytoplasmic marker), and Lamin B (a nuclear marker).

**e, f.** ChIP-qPCR analysis showing the occupancy of *Nfatc1* (**e**) and *Acp5* (**f**) gene promoters by Nfatc1 immunoprecipitated from control or Malat1-knockdown RAW264.7 cells treated with RANKL (50 ng/mL) for 3 days.  $n = 3$  biological replicates per group.

**g.** Immunoblotting of Nfatc1 and  $\beta$ -actin in control and Malat1-knockdown RAW264.7 cells transfected with Nfatc1 siRNA or scrambled negative control (NC).

Statistical significance in **a**, **e**, and **f** was determined by a two-tailed unpaired *t*-test. Error bars are s.e.m. The experiments in **b-d** and **g** were repeated independently three times, yielding similar results. Source data are provided as a Source Data file.

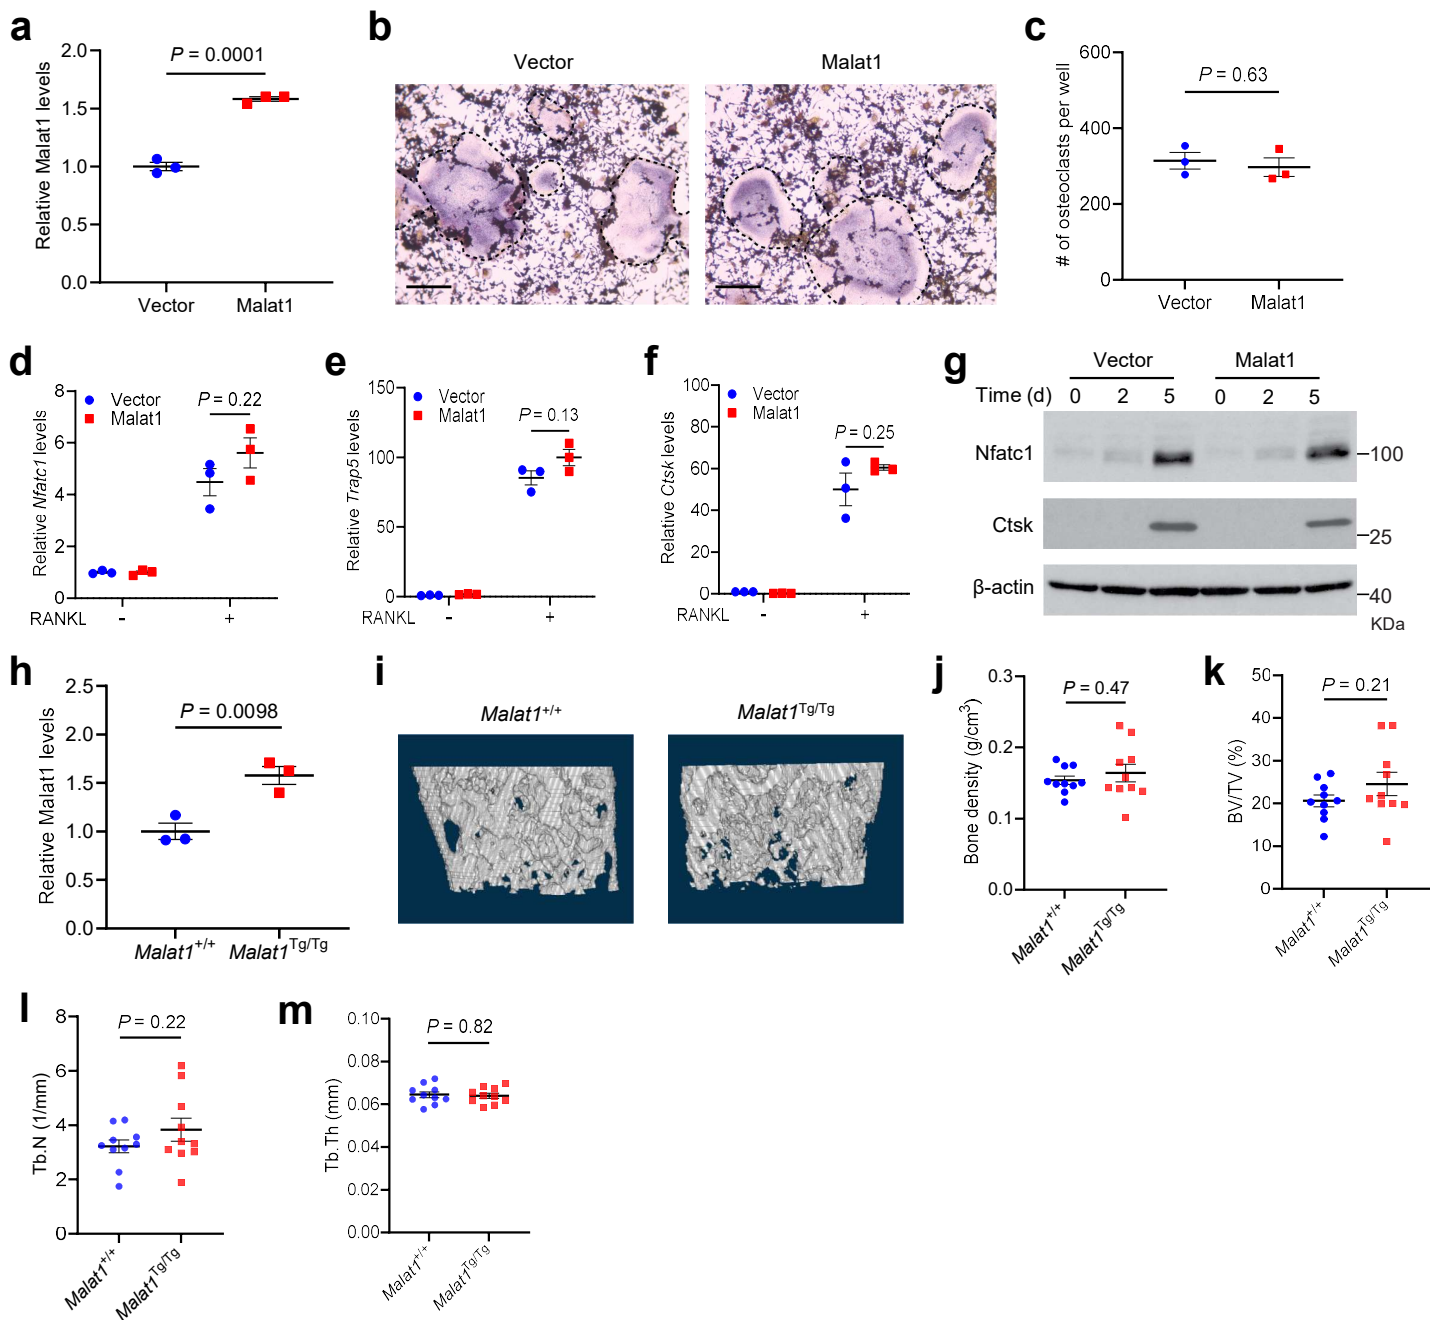

### Supplementary Figure 6. Evaluation of ectopic Malat1 expression in wild-type cells and mice.

**a.** qPCR of Malat1 in RAW264.7 cells with ectopic Malat1 expression via a piggyBac transposon system.  $n = 3$  biological replicates per group.

**b, c.** TRAP staining images (**b**) and quantification (**c**) of RAW264.7 cells with ectopic Malat1 expression. Cells were treated with RANKL (50 ng/mL) for 5 days. Multinucleated TRAP-positive cells (outlined by dashed lines) were counted. Scale bars, 100  $\mu\text{m}$ .  $n = 3$  wells per group.

**d-f.** qPCR of *Nfatc1* (**d**), *Trap5* (**e**), and *Ctsk* (**f**) in RAW264.7 cells with ectopic Malat1 expression. Cells were treated with RANKL (50 ng/mL) for 3 days.  $n = 3$  biological replicates per group.

**g.** Immunoblotting of *Nfatc1*, *Ctsk*, and  $\beta$ -actin in RAW264.7 cells with ectopic Malat1 expression. Cells were treated with RANKL (50 ng/mL) for 2 days and 5 days.

**h.** qPCR of Malat1 in the BMMs from *Malat1*<sup>+/+</sup> and *Malat1*<sup>Tg/Tg</sup> mice.  $n = 3$  biological replicates per group.

**i.** Representative  $\mu\text{CT}$  images of 3D bone structures of the femurs from 6-month-old male *Malat1*<sup>+/+</sup> and *Malat1*<sup>Tg/Tg</sup> mice.

**j-m.**  $\mu\text{CT}$ -based measurements of the BMD (**j**), BV/TV (**k**), Tb.N (**l**), and Tb.th (**m**) of the femurs from 6-month-old male *Malat1*<sup>+/+</sup> and *Malat1*<sup>Tg/Tg</sup> mice, with left and right femurs for each mouse measured.  $n = 5$  mice per group.

Statistical significance in **a**, **c-f**, **h**, and **j-m** was determined by a two-tailed unpaired *t*-test. Error bars are s.e.m. The experiments in **g** were repeated independently three times, yielding similar results. Source data are provided as a Source Data file.



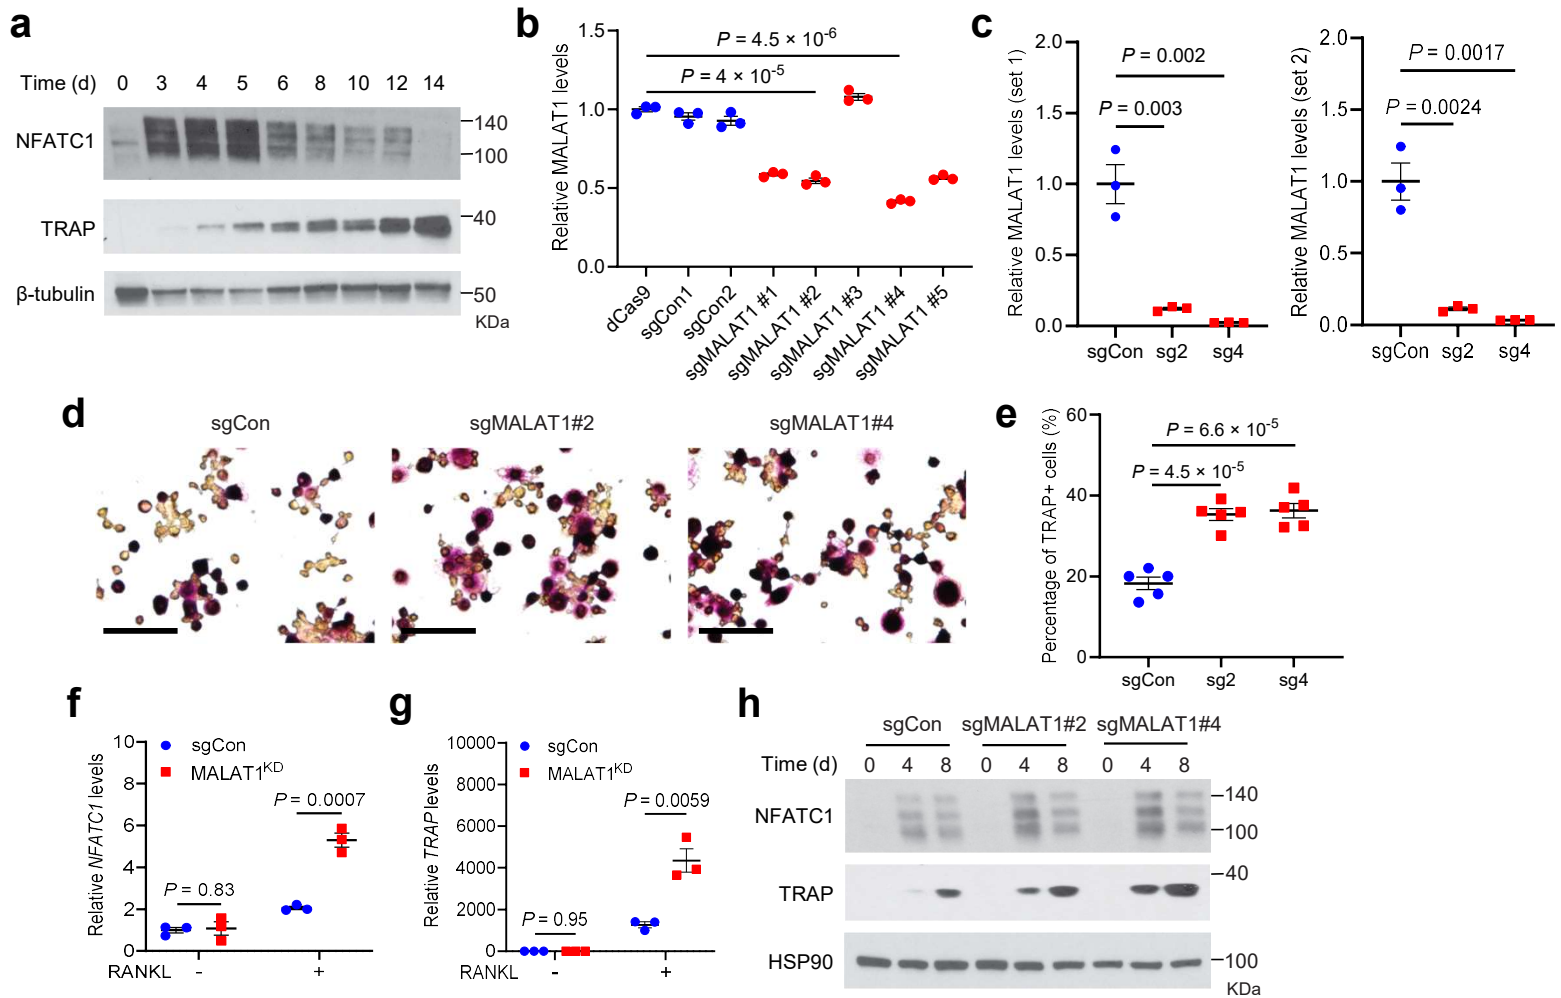

### Supplementary Figure 7. MALAT1 depletion promotes osteoclast differentiation in U937 human pre-osteoclast cells.

**a.** Immunoblotting of NFATC1, TRAP, and  $\beta$ -tubulin in U937 cells treated with PMA (100 ng/mL) for 2 days, followed by treatment with M-CSF (50 ng/mL) and RANKL (100 ng/mL) for the indicated times.

**b.** qPCR of MALAT1 in HEK293T cells with CRISPRi-mediated knockdown of MALAT1.  $n = 3$  biological replicates per group.

**c.** qPCR of MALAT1 in U937 cells with CRISPRi-mediated knockdown of MALAT1. Left panel: MALAT1 qPCR primer set 1; right panel: MALAT1 qPCR primer set 2.  $n = 3$  biological replicates per group.

**d, e.** TRAP staining images (**d**) and quantification (**e**) of control and MALAT1-knockdown U937 cells treated with PMA (100 ng/mL) for 2 days, followed by treatment with M-CSF (50 ng/mL) and RANKL (100 ng/mL) for 12 days. Scale bars, 100  $\mu$ m.  $n = 5$  wells per group.

**f, g.** qPCR of *NFATC1* (**f**) and *TRAP* (**g**) in control and MALAT1-knockdown U937 cells treated with M-CSF and RANKL for 4 days.  $n = 3$  biological replicates per group.

**h.** Immunoblotting of NFATC1, TRAP, and HSP90 in control and MALAT1-knockdown U937 cells treated with M-CSF and RANKL for 4 and 8 days.

Statistical significance in **b**, **c**, and **e-g** was determined by a two-tailed unpaired *t*-test. Error bars are s.e.m. The experiments in **a** and **h** were repeated independently three times, yielding similar results. Source data are provided as a Source Data file.

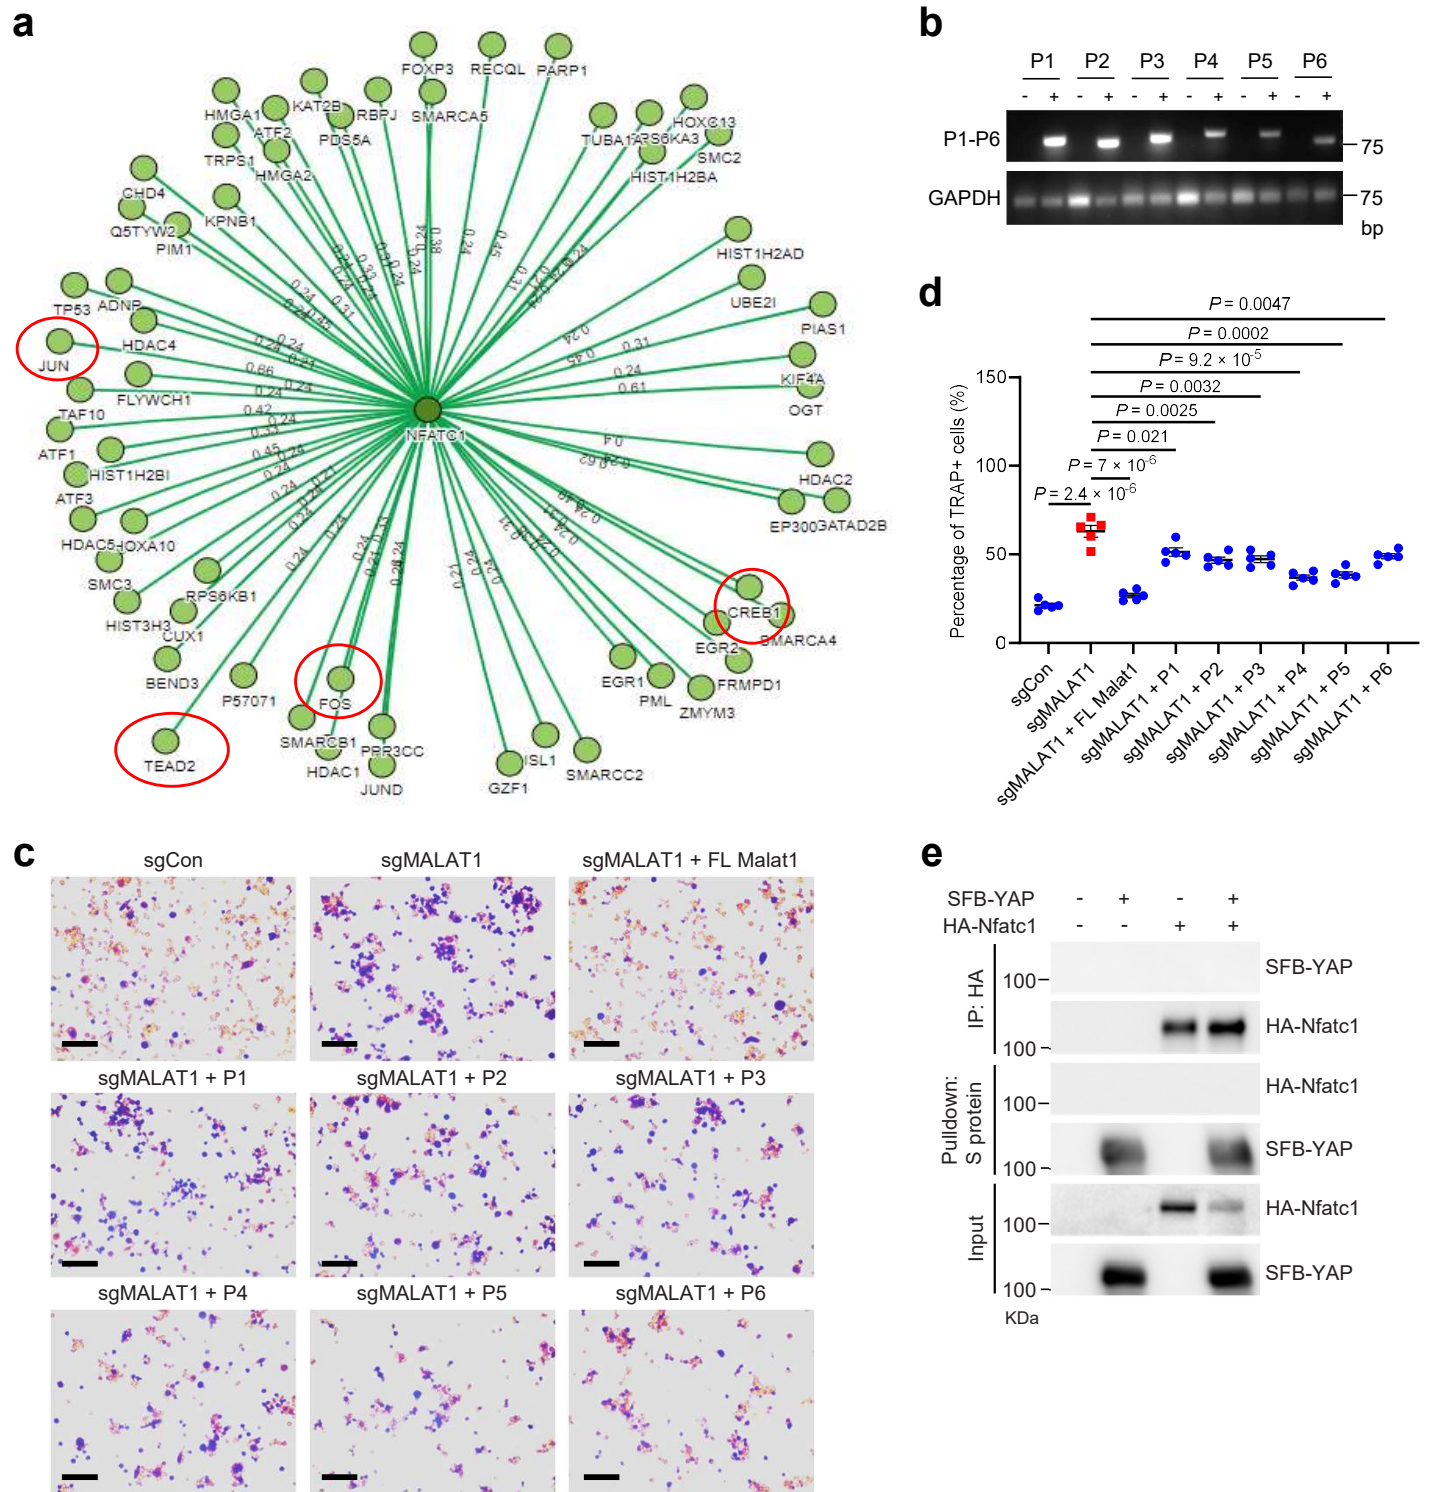

**Supplementary Figure 8. Analysis of the interaction of NFATC1 with other proteins and functional analysis of full-length Malat1 and Malat1 fragments**

**a.** Schematic representation of NFATC1-binding proteins, based on the Mentha database (<http://mentha.uniroma2.it/index.php>). The threshold value was an evidence score of  $> 0.2$ .

**b.** RT-PCR of Malat1 fragments (P1-P6) in MALAT1-depleted U937 cells with re-expression of Malat1 fragments.

**c, d.** TRAP staining images (**c**) and quantification (**d**) of control, MALAT1-knockdown, and Malat1-rescued (with either full-length Malat1 or Malat1 fragments) U937 cells treated with PMA (100 ng/mL) for 2 days, followed by treatment with M-CSF (50 ng/mL) and RANKL (100 ng/mL) for 12 days. Scale bars in **c**, 100  $\mu$ m. Statistical significance in **d** was determined by a two-tailed unpaired *t*-test. Error bars are s.e.m.  $n = 5$  wells per group.

**e.** HEK293T cells were co-transfected with HA-Nfatc1 and SFB-YAP and subjected to pulldown with an HA-specific antibody or S-protein beads, followed by immunoblotting with antibodies against FLAG and HA.

The experiments in **b** and **e** were repeated independently three times, yielding similar results. Source data are provided as a Source Data file.

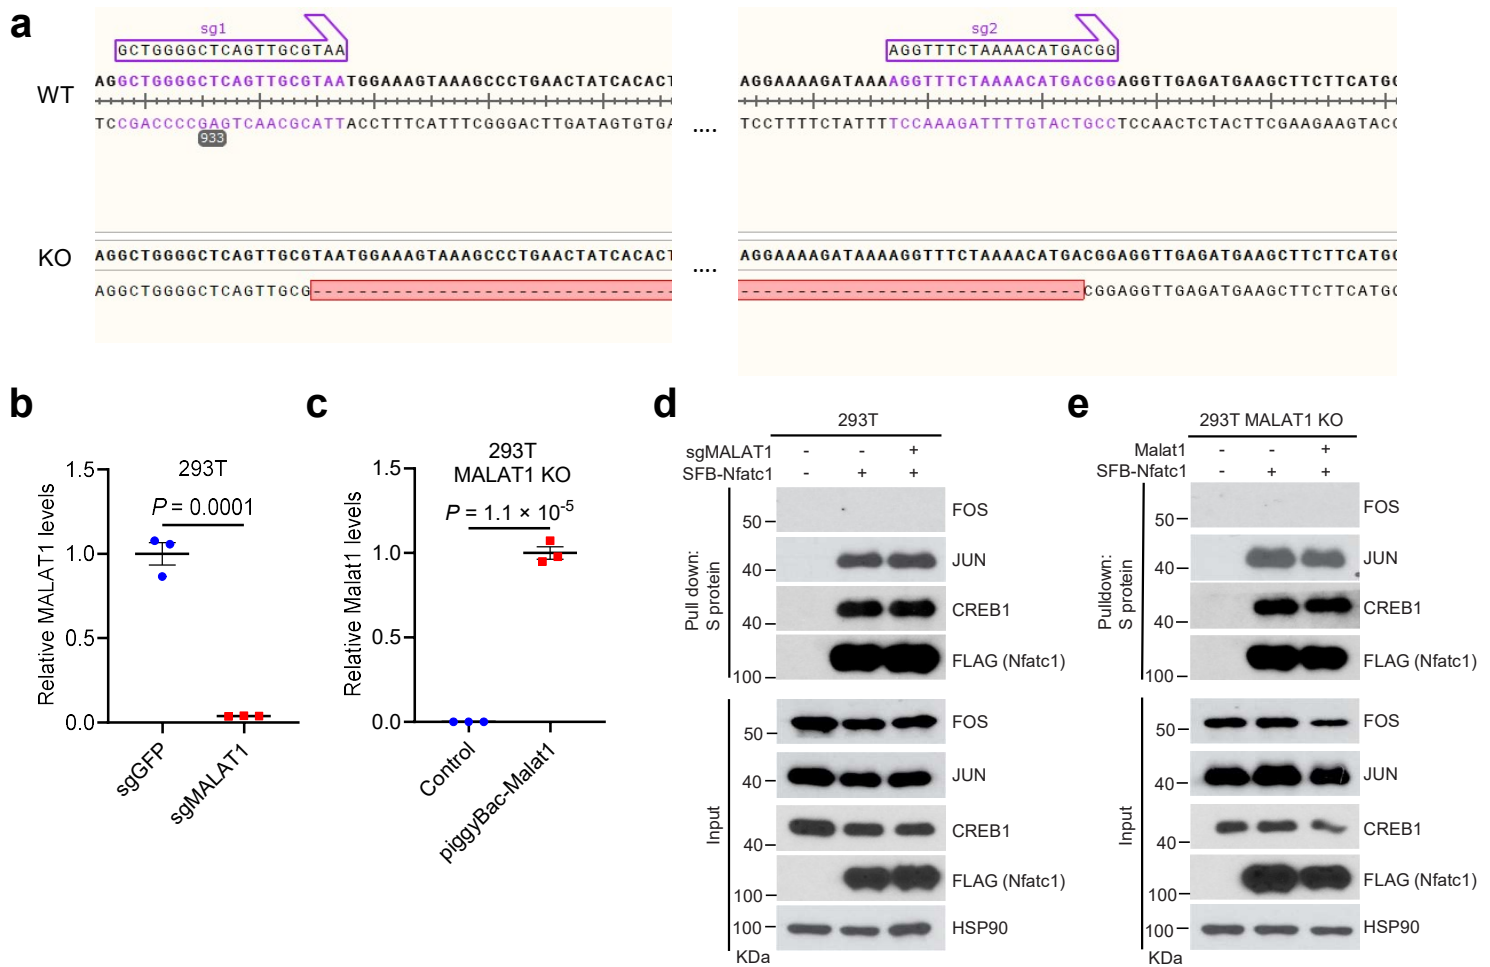

**Supplementary Figure 9. MALAT1 has no effect on the interaction of NFATC1 with other transcription regulators involved in osteoclastogenesis.**

**a.** Schematic representation of the generation of MALAT1-null HEK293T cells by using a double excision CRISPR-knockout method. The MALAT1-knockout cells were verified by DNA sequencing as lacking the fragment between the two sgRNA sites.

**b.** qPCR of MALAT1 in control and MALAT1-knockout HEK293T cells.  $n = 3$  biological replicates per group.

**c.** qPCR of Malat1 in MALAT1-knockout HEK293T cells with or without piggyBac-mediated expression of Malat1.  $n = 3$  biological replicates per group.

**d.** Control and MALAT1-knockout HEK293T cells transfected with SFB-Nfatc1 were subjected to pulldown with S-protein beads, followed by immunoblotting with antibodies against FOS, JUN, CREB1, FLAG, and HSP90.

**e.** MALAT1-knockout and Malat1-restored HEK293T cells co-transfected with SFB-Nfatc1 were subjected to pulldown with S-protein beads, followed by immunoblotting with antibodies against FOS, JUN, CREB1, FLAG, and HSP90.

Statistical significance in **b** and **c** was determined by a two-tailed unpaired *t*-test. Error bars are s.e.m. The experiments in **d** and **e** were repeated independently three times, yielding similar results. Source data are provided as a Source Data file.

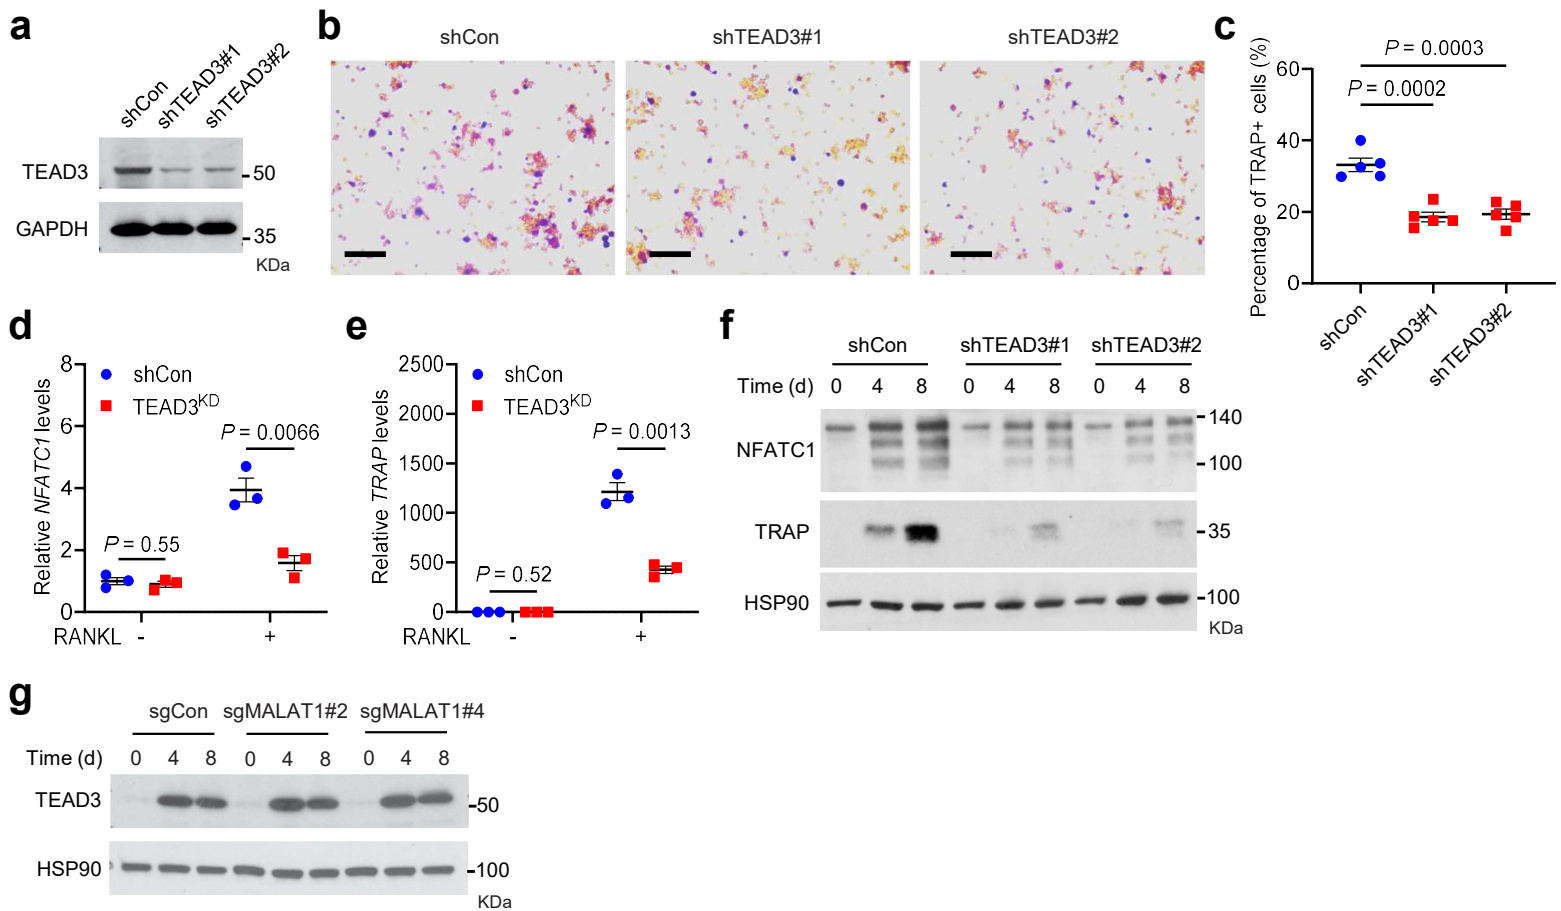

### Supplementary Figure 10. Effect of TEAD3 knockdown on RANKL-induced human osteoclastogenesis.

**a.** Immunoblotting of TEAD3 and HSP90 in U937 cells transduced with two independent TEAD3 shRNAs or scrambled control shRNA.

**b, c.** TRAP staining images (**b**) and quantification (**c**) of control and TEAD3-knockdown U937 cells treated with M-CSF and RANKL for 14 days.  $n = 5$  wells per group.

**d, e.** qPCR of NFATC1(**d**) and TRAP (**e**) in control and TEAD3-knockdown U937 cells treated with M-CSF and RANKL for 4 days.  $n = 3$  biological replicates per group.

**f.** Immunoblotting of NFATC1, TRAP, and HSP90 in control and TEAD3-knockdown U937 cells treated with M-CSF and RANKL for 4 days and 8 days.

**g.** Immunoblotting of TEAD3 and HSP90 in control and MALAT1-knockdown U937 cells treated with M-CSF and RANKL for 4 days and 8 days.

Statistical significance in **c-e** was determined by a two-tailed unpaired *t*-test. Error bars are s.e.m. The experiments in **a**, **f**, and **g** were repeated independently three times, yielding similar results. Source data are provided as a Source Data file.

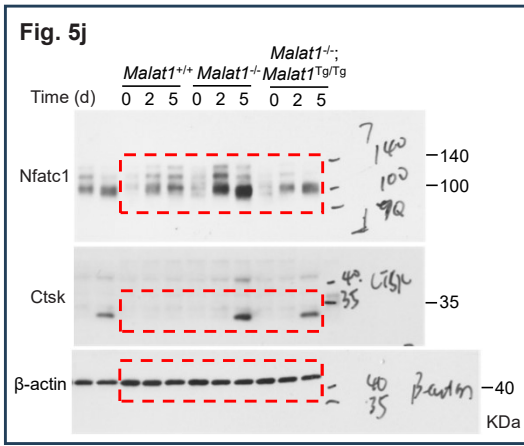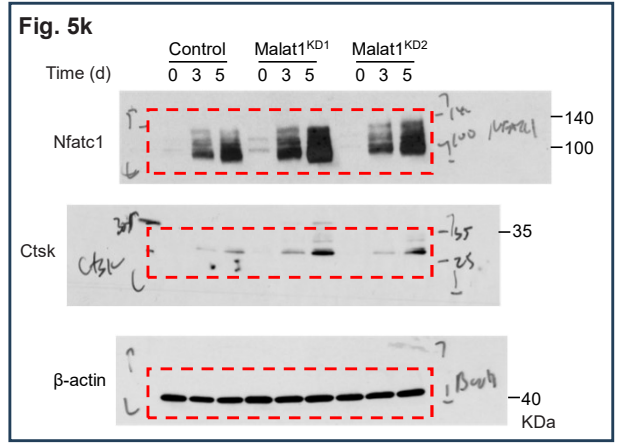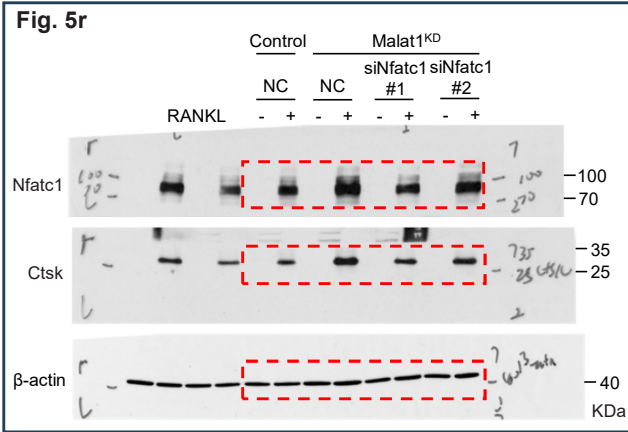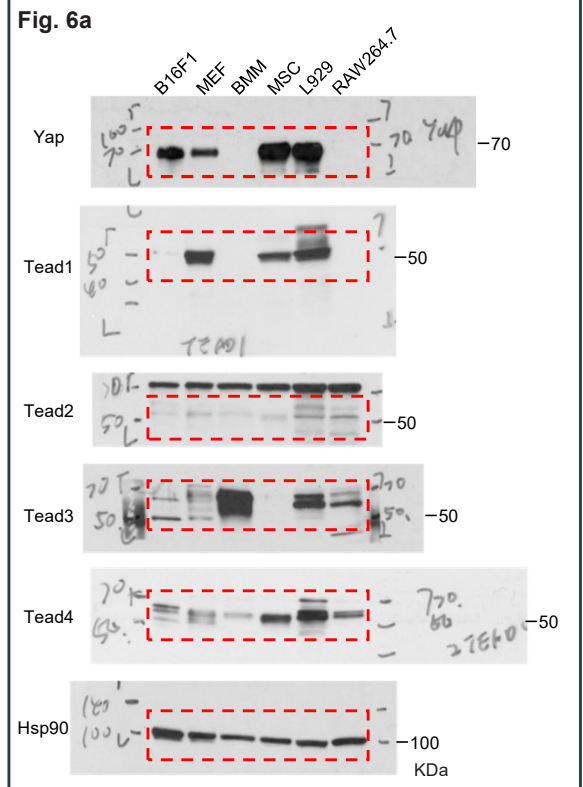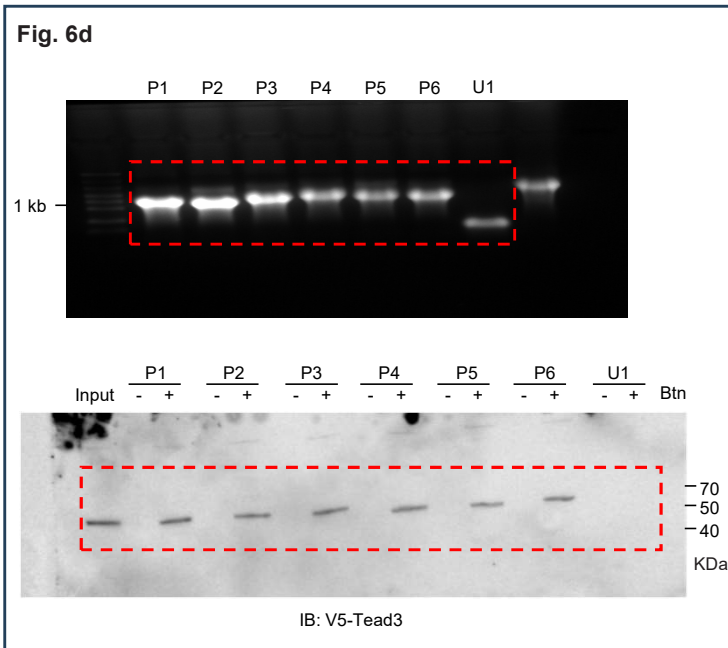

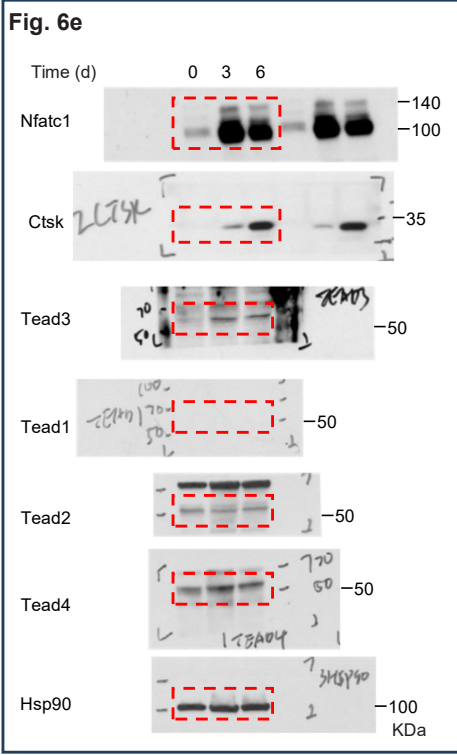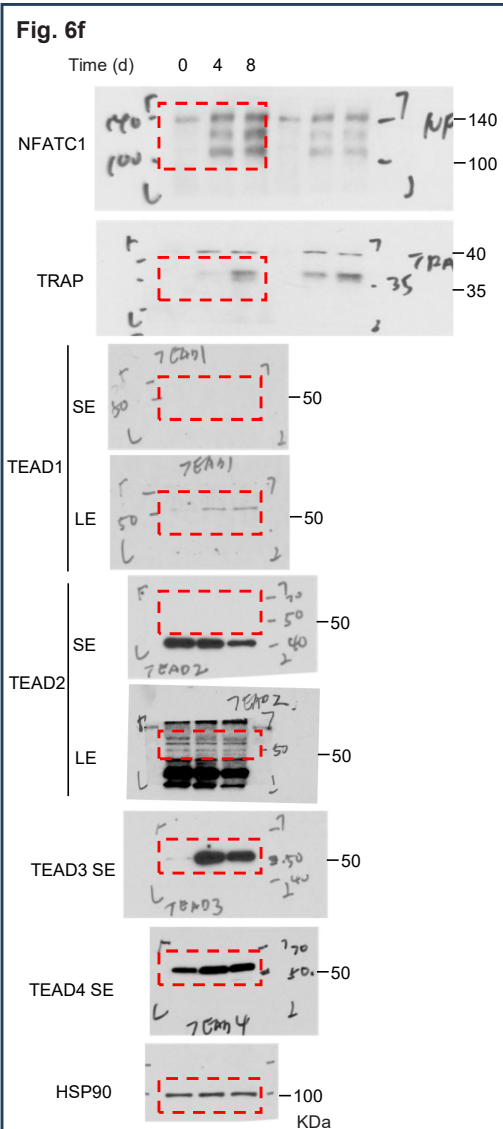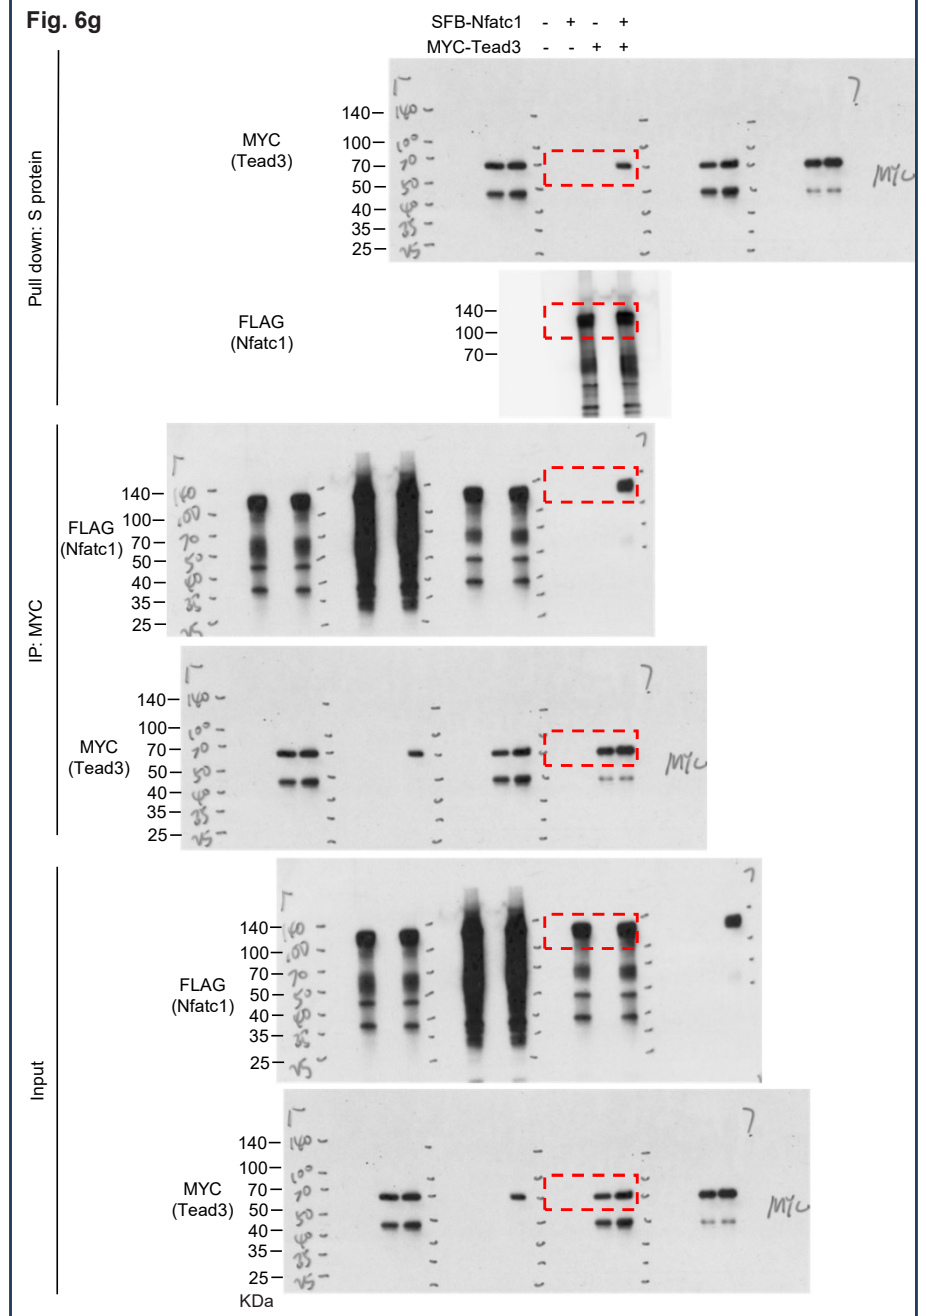

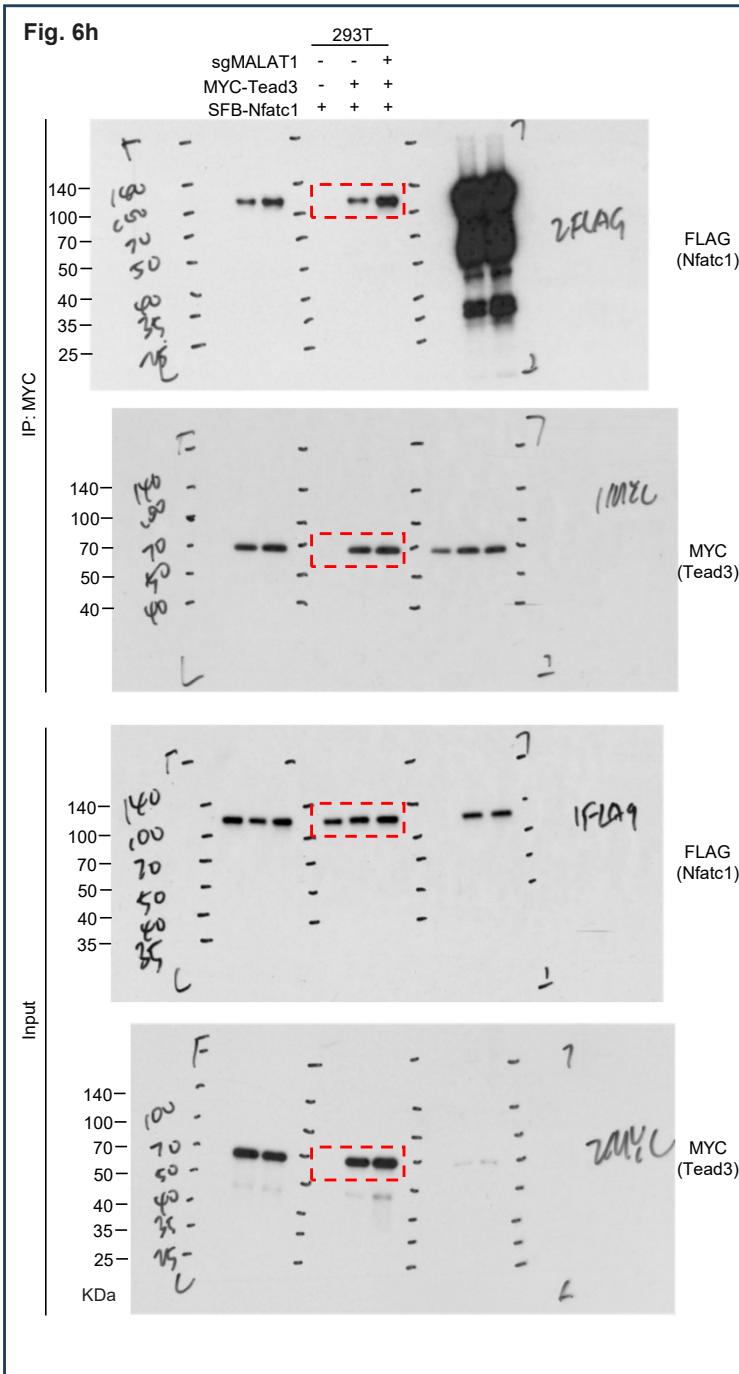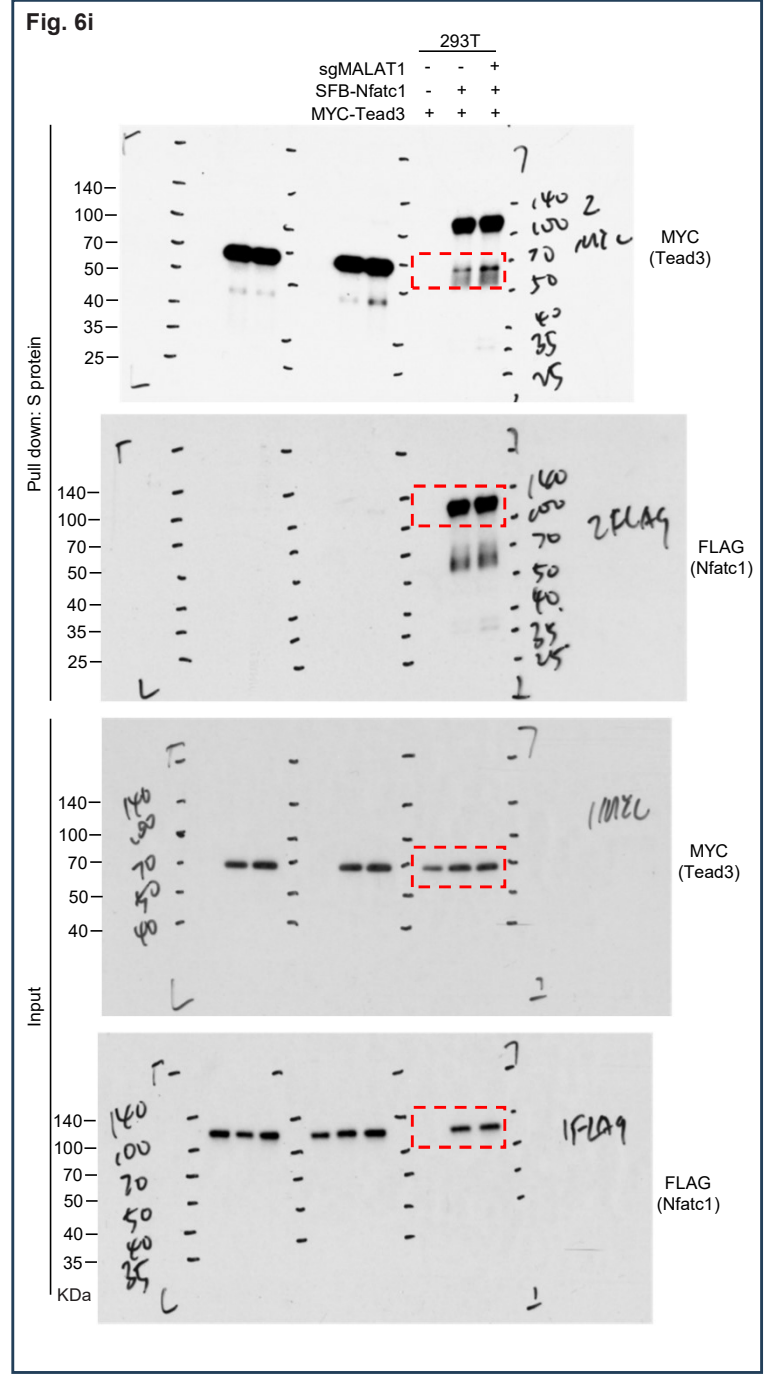





Fig. 6m

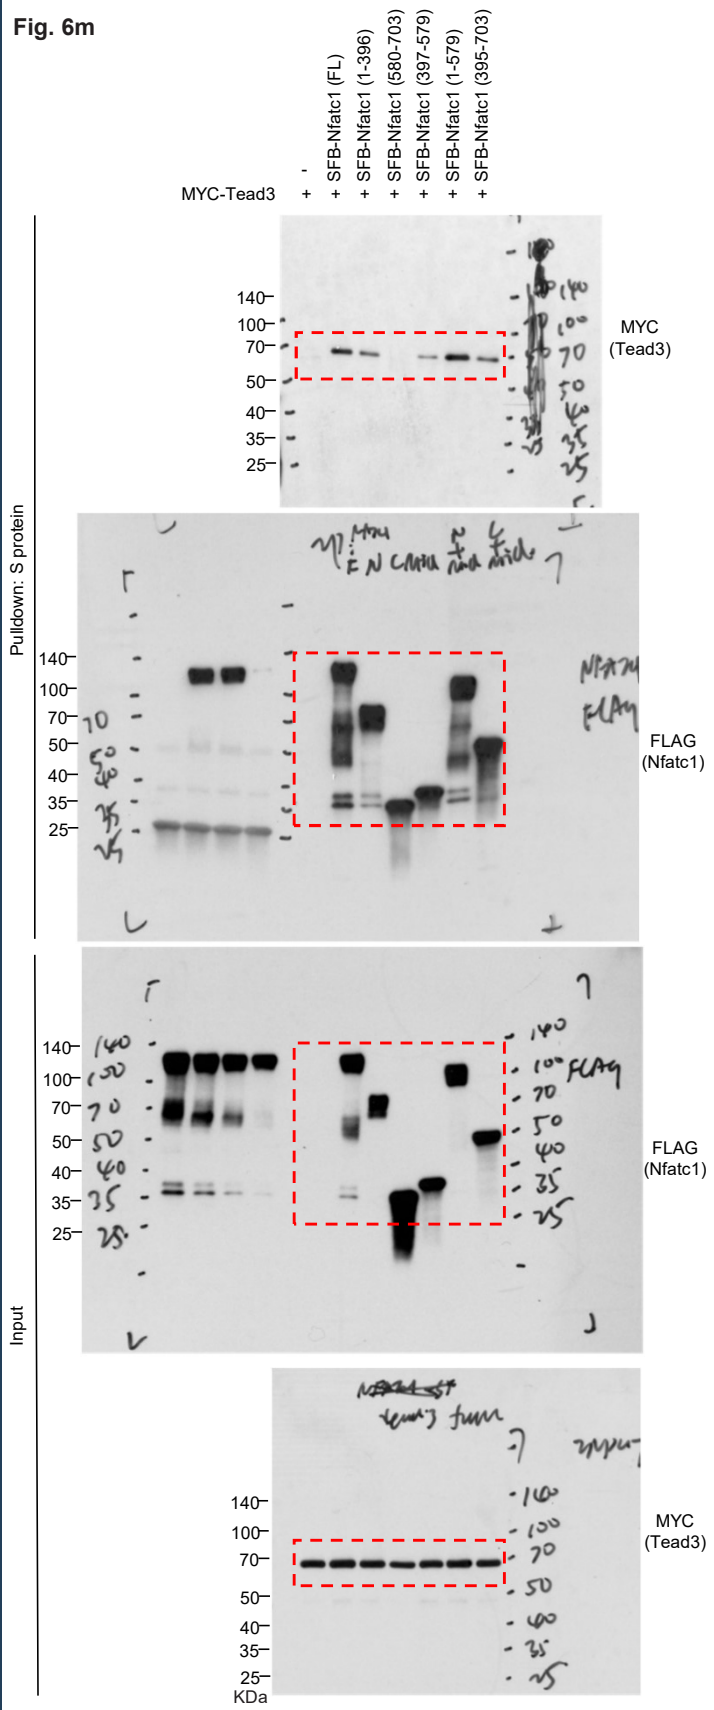

Fig. 6n

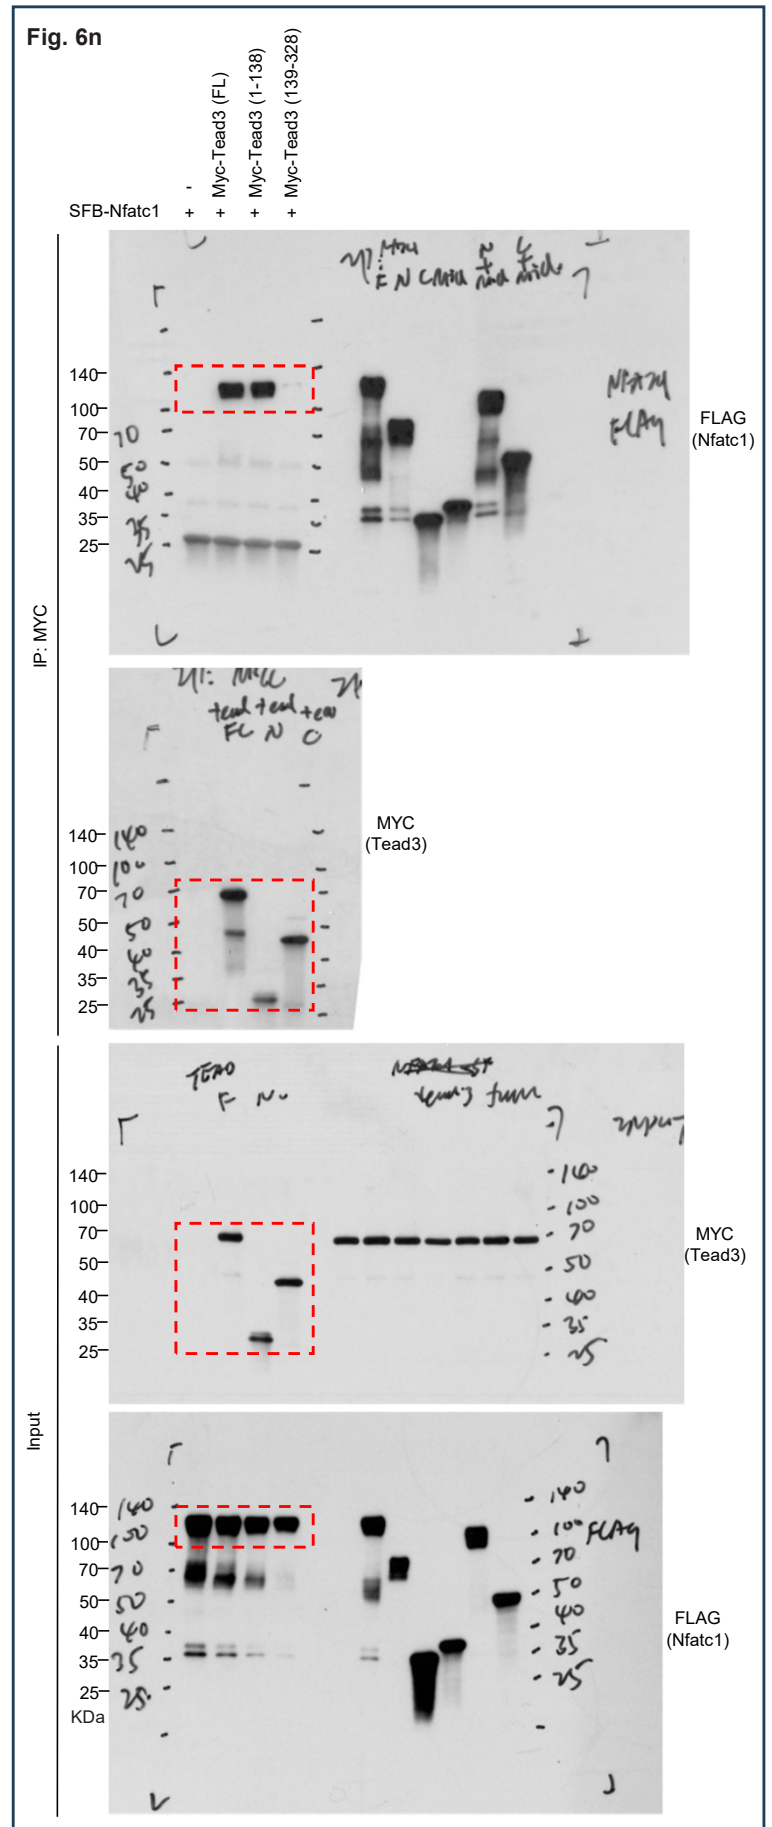

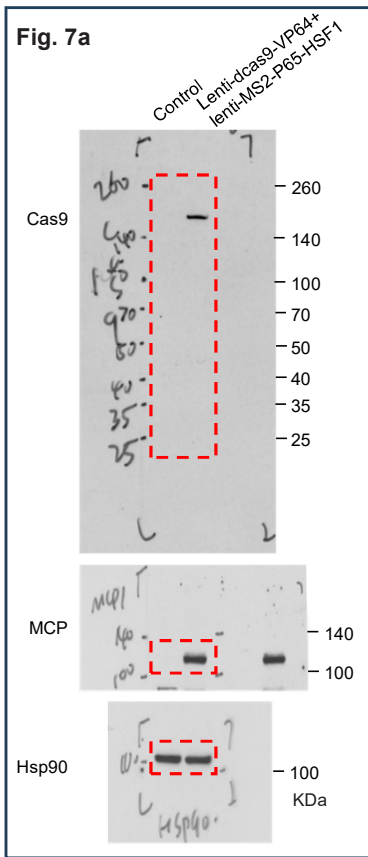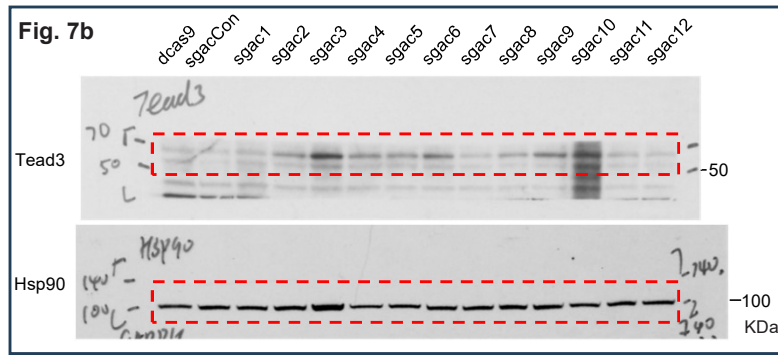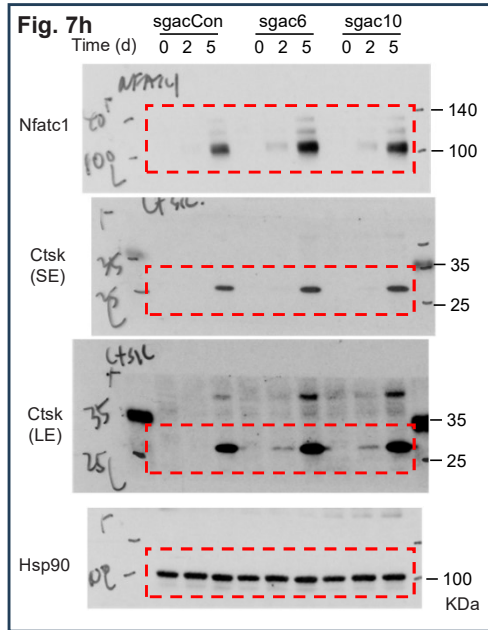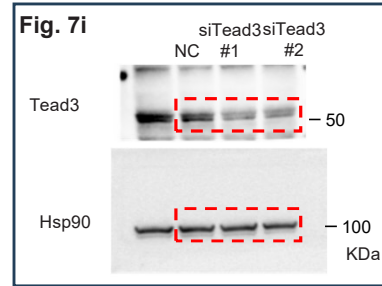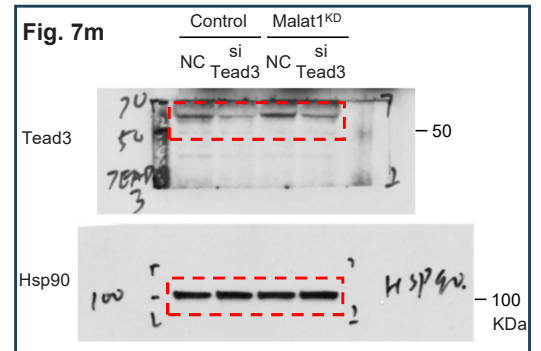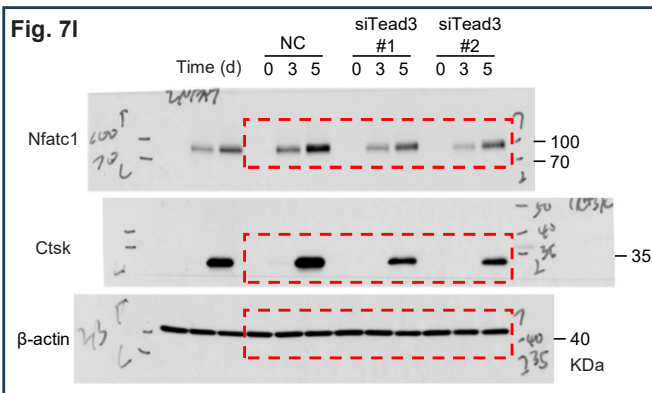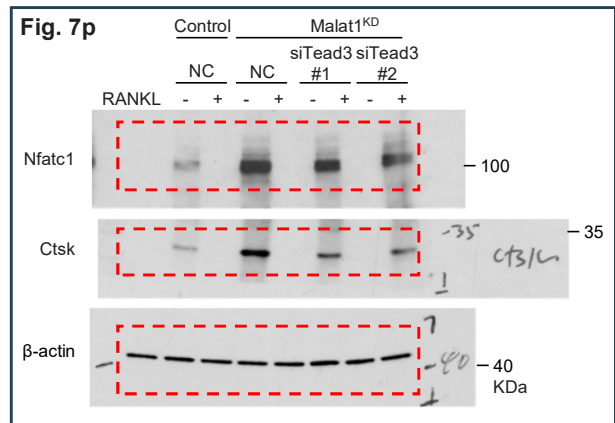

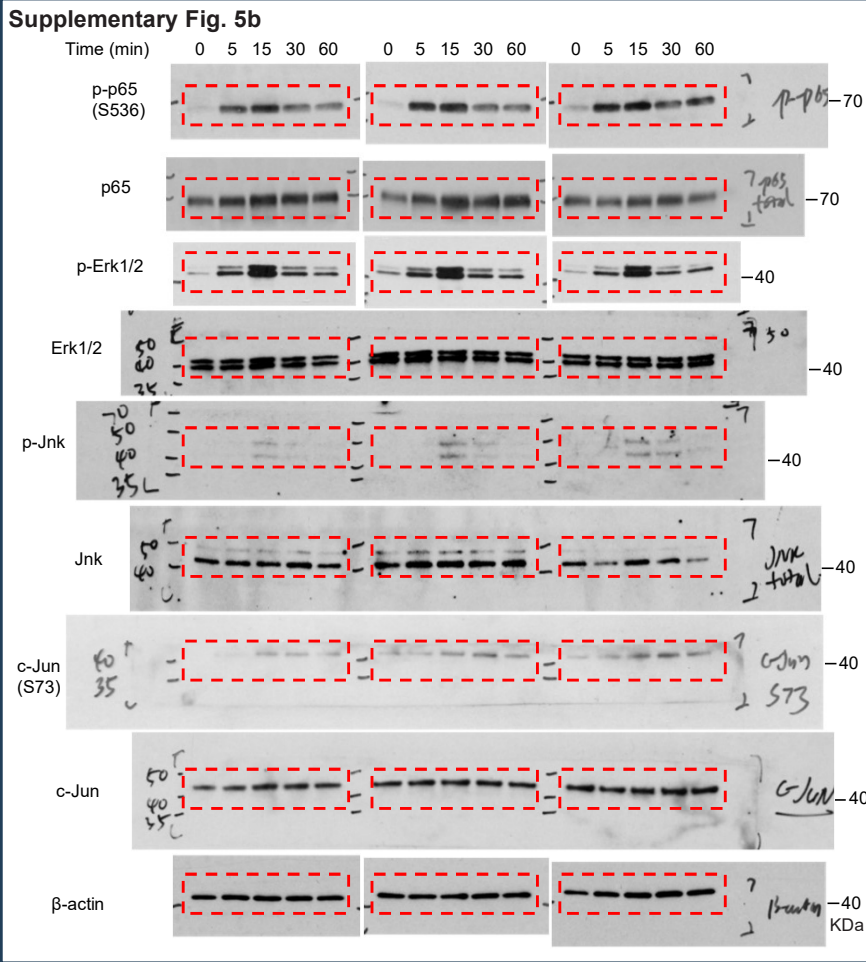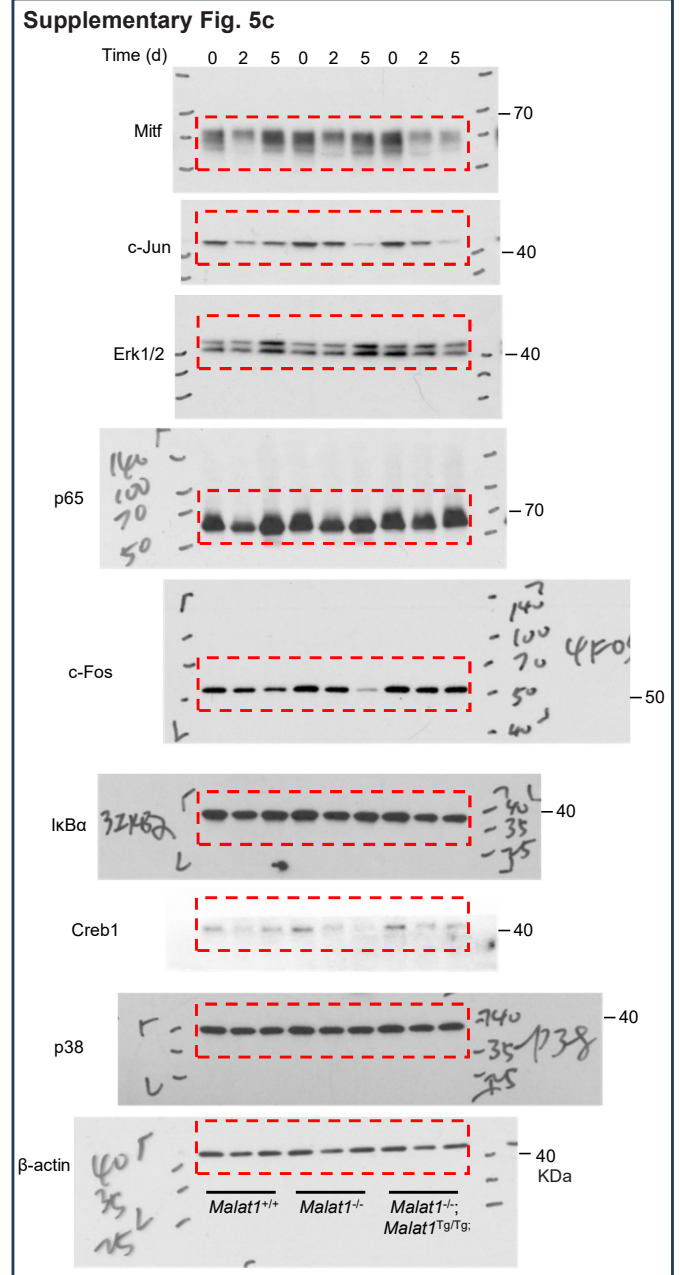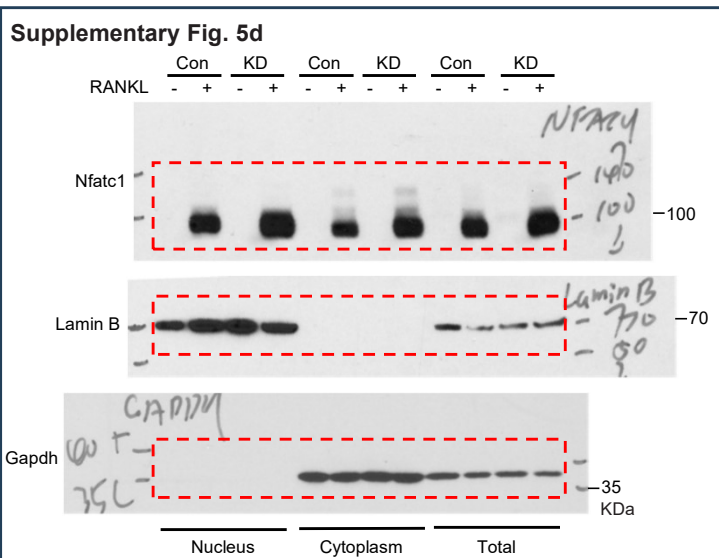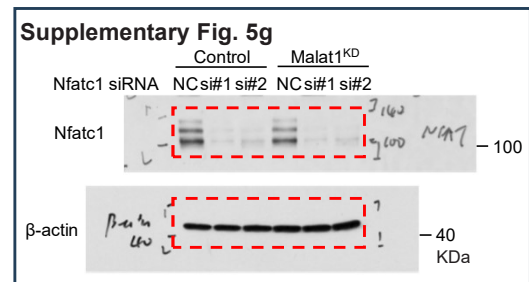

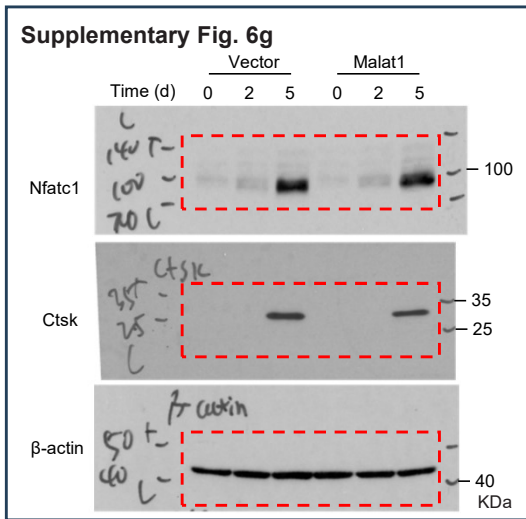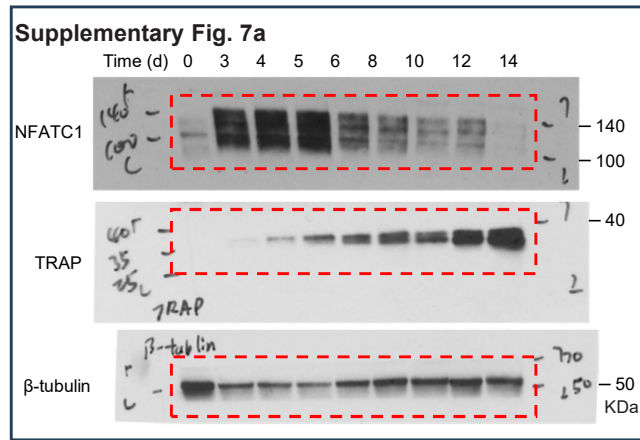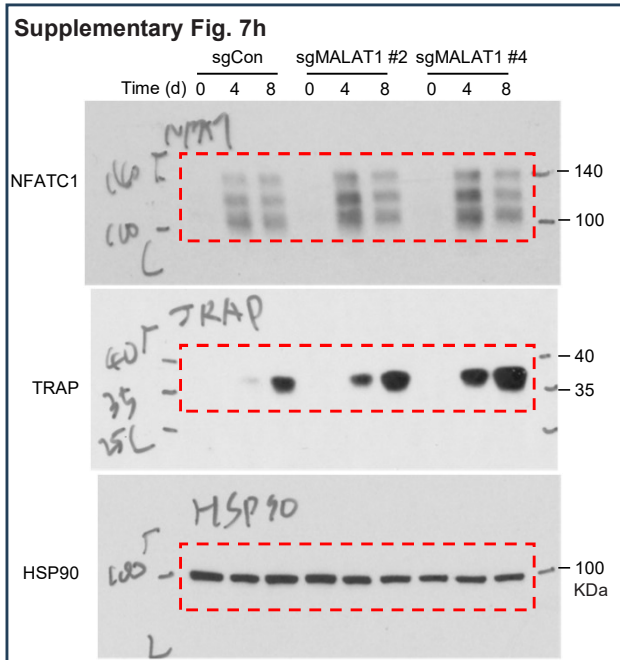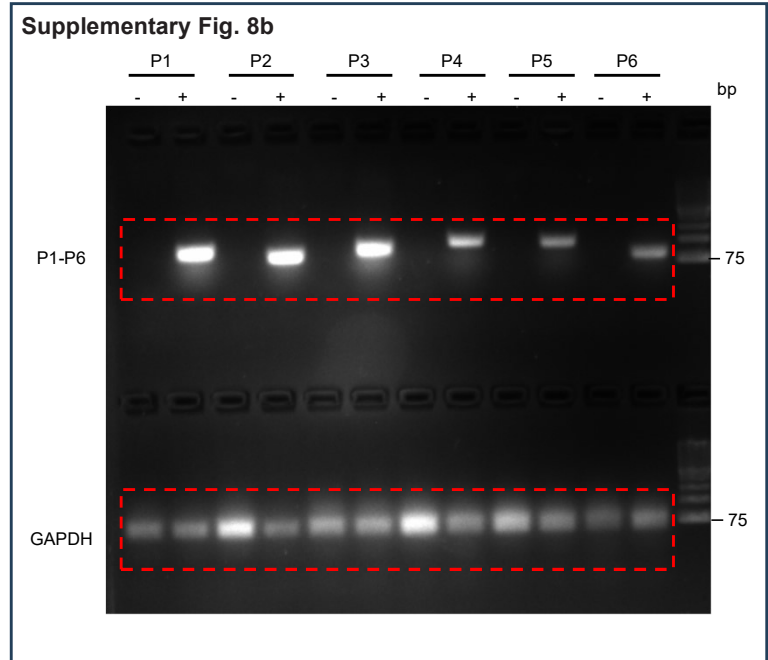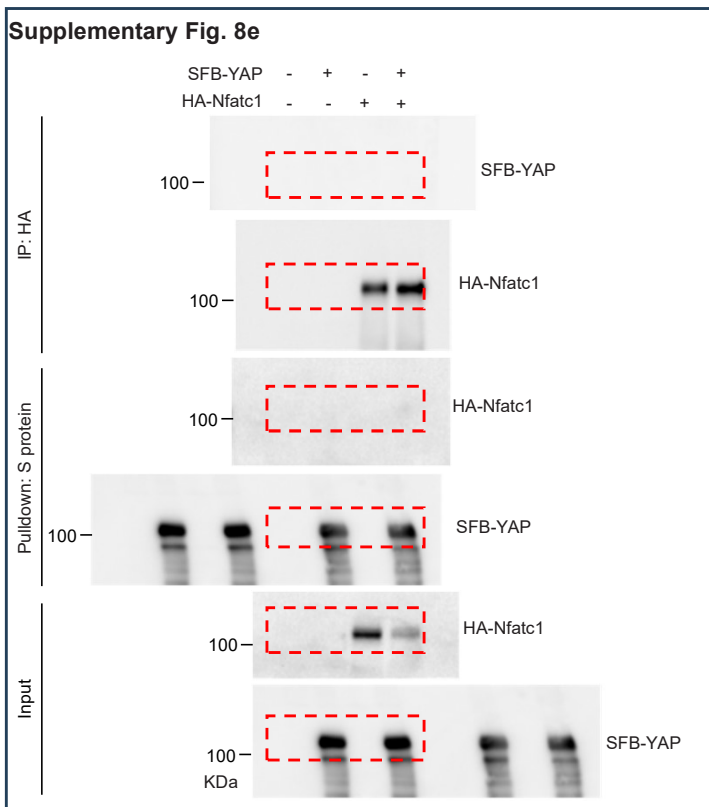

**Supplementary Figure 11.**  
All uncropped blots and gels in this manuscript.

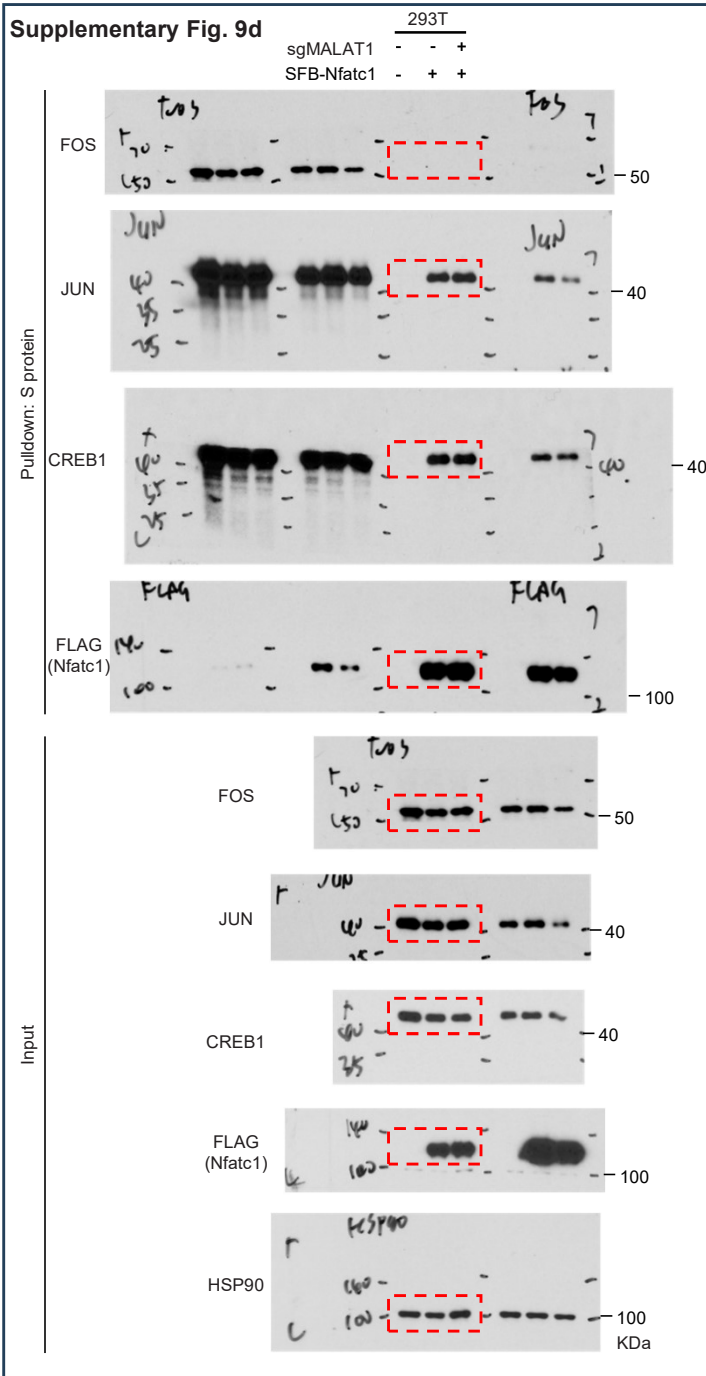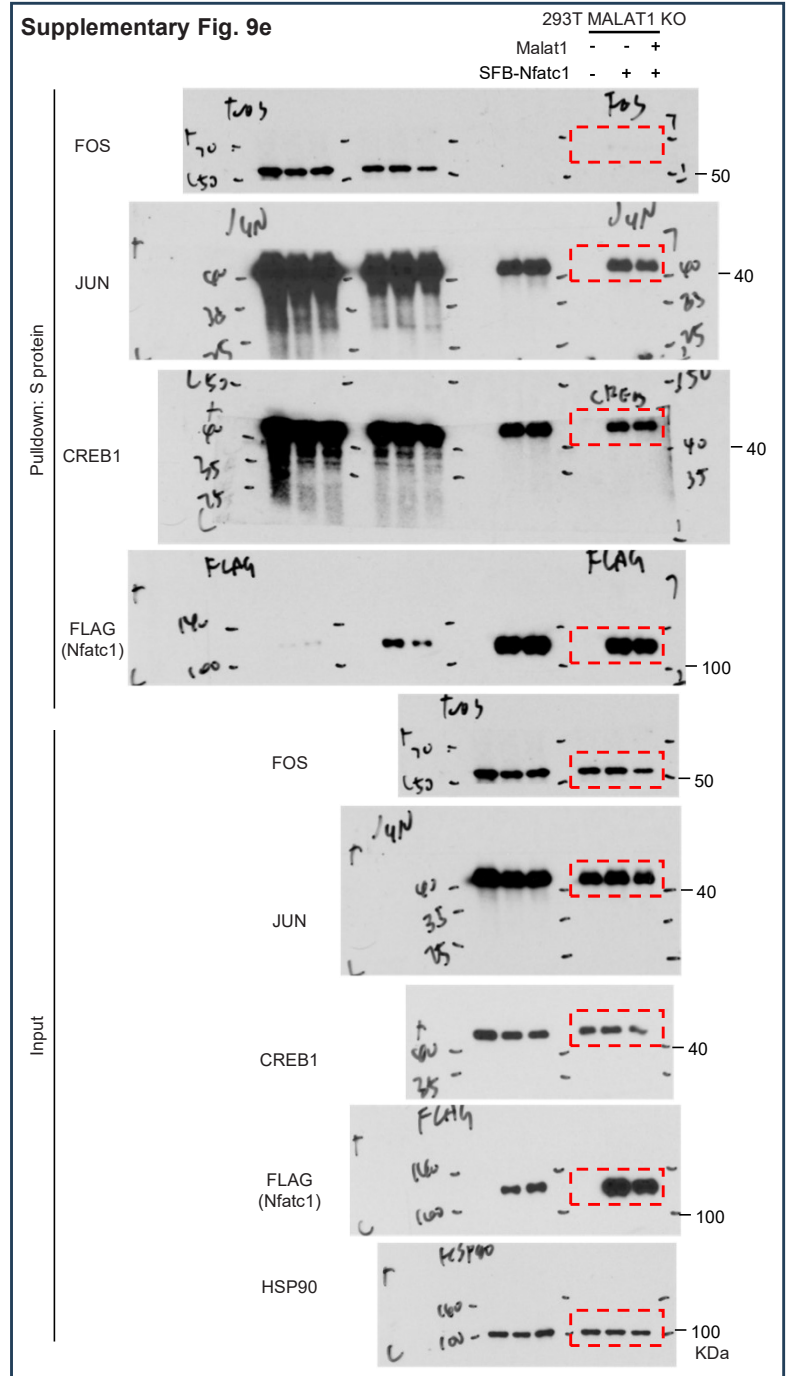

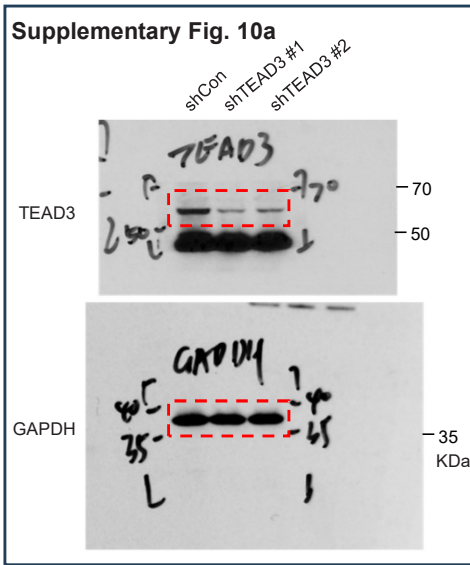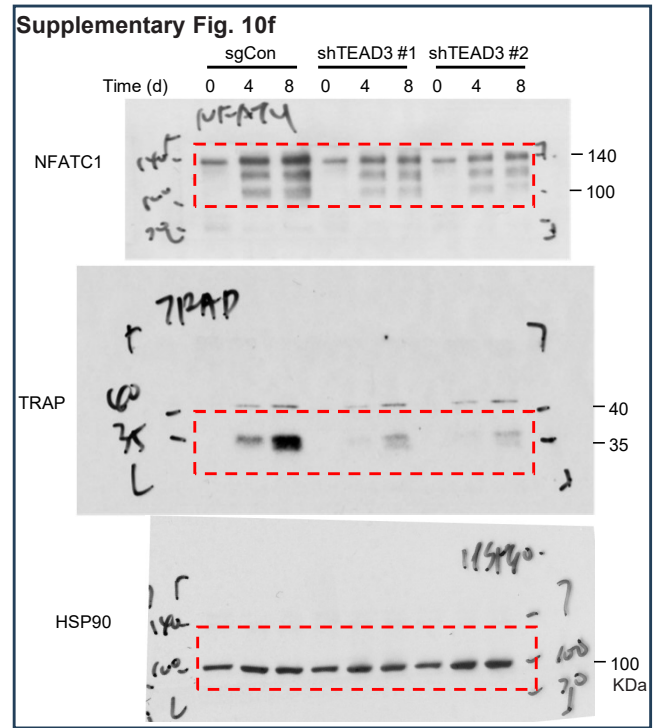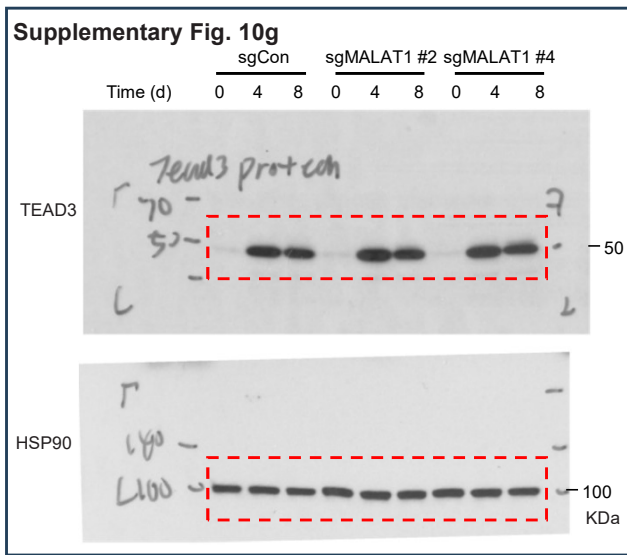

Supplement: 41467_2024_46602_MOESM1_ESM.pdf [file 41467_2024_46602_MOESM1_ESM.pdf]
