# Supplementary material for: Long noncoding RNA Malat1 protects against osteoporosis and bone metastasis
Source: PubMed Central journal article supplement (PMC10944492; doi:10.1038/s41467-024-46602-3), 2024-03-16
Supplement: 41467_2024_46602_MOESM3_ESM.pdf [file 41467_2024_46602_MOESM3_ESM.pdf]

## **Description of Additional Supplementary Files**

**File Name: Supplementary Data 1**

**Description:** Gene set enrichment analysis of human CD14+ macrophages and MGCs. NES: normalized enrichment score.  $p.adjust < 0.05$ .

**File Name: Supplementary Data 2**

**Description:** Primers used for cloning.

**File Name: Supplementary Data 3**

**Description:** sgRNA sequences for CRISPRi and CRISPRa.

**File Name: Supplementary Data 4**

**Description:** Primer sequences for qPCR.

**File Name: Supplementary Data 5**

**Description:** Primer sequences for ChIP-qPCR.
